# Supplementary material
Source: MDPI journal article supplement (https://www.mdpi.com/2227-7072/11/1/29)
Supplement: s1 [file s1]

## SUPPLEMENTARY MATERIALS

### Supplementary 1 - FINANCIAL STATEMENT

#### 1.1. Consolidate Financial Statement, Centuria Office REIT Annual Report 2015

##### **Centuria Metropolitan REIT**

##### **Consolidated statement of profit or loss and other comprehensive income**

**For the year ended 30 June 2015**

|                                                                                                            | Note | 30 Jun 2015<br>\$ | 30 Jun 2014<br>\$ |
|------------------------------------------------------------------------------------------------------------|------|-------------------|-------------------|
| Revenue                                                                                                    |      |                   |                   |
| Rent and recoverable outgoings                                                                             |      | 18,757,117        | 12,289,991        |
| Other income                                                                                               |      |                   |                   |
| Interest income                                                                                            |      | 104,446           | 41,542            |
| Gain on fair value of investment properties                                                                | 7    | -                 | 2,689,417         |
| Gain on fair value of derivative financial instruments                                                     |      | 498,147           | 1,502,518         |
| Expenses                                                                                                   |      |                   |                   |
| Net loss on fair value of investment properties after write-down of stamp duty and other transaction costs | 7    | (451,302)         | -                 |
| Rates, taxes and other property outgoings                                                                  |      | (4,105,306)       | (3,524,401)       |
| Finance costs                                                                                              |      | (3,927,969)       | (5,317,882)       |
| Incentive fees waived/(expense)                                                                            | 12   | 122,943           | (122,943)         |
| Management fees                                                                                            | 19   | (952,709)         | (662,864)         |
| Professional fees                                                                                          |      | (318,217)         | (190,301)         |
| Public Offer transaction costs                                                                             |      | (660,099)         | -                 |
| Other expenses                                                                                             |      | (135,448)         | (27,354)          |
| <b>Profit from continuing operations for the year</b>                                                      |      | <b>8,931,603</b>  | <b>6,677,723</b>  |
| <b>Net profit for the year</b>                                                                             |      | <b>8,931,603</b>  | <b>6,677,723</b>  |
| Other comprehensive income                                                                                 |      |                   |                   |
| <b>Other comprehensive income for the year</b>                                                             |      | <b>-</b>          | <b>-</b>          |
| <b>Total comprehensive income for the year</b>                                                             |      | <b>8,931,603</b>  | <b>6,677,723</b>  |
| <b>Net profit attributable to:</b>                                                                         |      |                   |                   |
| Members of the Parent                                                                                      | 14   | 7,091,485         | 3,829,710         |
| Non-controlling interest - CMR2                                                                            | 15   | 1,840,118         | 2,848,013         |
|                                                                                                            |      | <b>8,931,603</b>  | <b>6,677,723</b>  |
| <b>Total comprehensive income attributable to:</b>                                                         |      |                   |                   |
| Members of the Parent                                                                                      |      | 7,091,485         | 3,829,710         |
| Non-controlling interest - CMR2                                                                            |      | 1,840,118         | 2,848,013         |
|                                                                                                            |      | <b>8,931,603</b>  | <b>6,677,723</b>  |
| <b>Basic and diluted earnings per CMR1 unit</b>                                                            |      |                   |                   |
| Units on issue (cents per unit)                                                                            | 17   | 12.80             | 18.08             |
| <b>Basic and diluted earnings per CMA stapled security</b>                                                 |      |                   |                   |
| Stapled securities on issue (cents per stapled security)                                                   | 17   | 16.12             | 31.53             |

The notes on pages 14 to 39 form an integral part of these financial statements.

# Centuria Metropolitan REIT

## Consolidated statement of financial position

As at 30 June 2015

|                                      | Note | 30 Jun 2015<br>\$  | 30 Jun 2014<br>\$  |
|--------------------------------------|------|--------------------|--------------------|
| <b>Assets</b>                        |      |                    |                    |
| <b>Current assets</b>                |      |                    |                    |
| Cash and cash equivalents            | 5    | 6,273,121          | 2,760,329          |
| Trade and other receivables          | 6    | 231,676            | 119,476            |
| Prepayments                          | 8    | 378,919            | 233,656            |
| <b>Total current assets</b>          |      | <b>6,883,716</b>   | <b>3,113,461</b>   |
| <b>Non-current assets</b>            |      |                    |                    |
| Investment properties                | 7    | 323,110,000        | 110,450,000        |
| <b>Total non-current assets</b>      |      | <b>323,110,000</b> | <b>110,450,000</b> |
| <b>Total assets</b>                  |      | <b>329,993,716</b> | <b>113,563,461</b> |
| <b>Liabilities</b>                   |      |                    |                    |
| <b>Current liabilities</b>           |      |                    |                    |
| Trade and other payables             | 9    | 10,092,241         | 1,131,064          |
| Borrowings                           | 10   | -                  | 67,911,490         |
| Derivative financial instruments     | 11   | -                  | 1,230,881          |
| <b>Total current liabilities</b>     |      | <b>10,092,241</b>  | <b>70,273,435</b>  |
| <b>Non-current liabilities</b>       |      |                    |                    |
| Borrowings                           | 10   | 83,912,381         | -                  |
| Derivative financial instruments     | 11   | 732,734            | -                  |
| Provisions                           | 12   | -                  | 122,943            |
| <b>Total non-current liabilities</b> |      | <b>84,645,115</b>  | <b>122,943</b>     |
| <b>Total liabilities</b>             |      | <b>94,737,356</b>  | <b>70,396,378</b>  |
| <b>Net assets</b>                    |      | <b>235,256,360</b> | <b>43,167,083</b>  |
| <b>Equity</b>                        |      |                    |                    |
| Issued capital                       | 13   | 129,110,151        | 29,255,257         |
| Accumulated losses                   | 14   | (4,383,713)        | (6,357,569)        |
| Non-controlling interest - CMR2      | 15   | 110,529,922        | 20,269,395         |
| <b>Total equity</b>                  |      | <b>235,256,360</b> | <b>43,167,083</b>  |

The notes on pages 14 to 39 form an integral part of these financial statements.

# Centuria Metropolitan REIT

## Consolidated statement of changes in equity

For the year ended 30 June 2015

|                                         | Note    | Issued capital<br>\$ | Accumulated<br>losses<br>\$ | Non-<br>controlling<br>interest<br>\$ | Total equity<br>\$ |
|-----------------------------------------|---------|----------------------|-----------------------------|---------------------------------------|--------------------|
| Balance at 1 July 2013                  |         | 29,255,257           | (9,276,282)                 | 18,332,378                            | 38,311,353         |
| Net profit for the year                 |         | -                    | 3,829,710                   | 2,848,013                             | 6,677,723          |
| Other comprehensive income              |         | -                    | -                           | -                                     | -                  |
| Total comprehensive income for the year |         | -                    | 3,829,710                   | 2,848,013                             | 6,677,723          |
| Distributions to security holders       | 16      | -                    | (910,997)                   | (910,996)                             | (1,821,993)        |
| <b>Balance at 30 June 2014</b>          |         | <b>29,255,257</b>    | <b>(6,357,569)</b>          | <b>20,269,395</b>                     | <b>43,167,083</b>  |
| Net profit for the year                 |         | -                    | 7,091,485                   | 1,840,118                             | 8,931,603          |
| Other comprehensive income              |         | -                    | -                           | -                                     | -                  |
| Total comprehensive income for the year |         | -                    | 7,091,485                   | 1,840,118                             | 8,931,603          |
| Applications                            | 13 & 15 | 111,327,567          | -                           | 103,083,591                           | 214,411,158        |
| Redemptions                             | 13 & 15 | (7,307,648)          | -                           | (6,324,505)                           | (13,632,153)       |
| Equity raising costs                    | 13 & 15 | (4,165,025)          | -                           | (3,839,498)                           | (8,004,523)        |
| Distributions to security holders       | 16      | -                    | (5,117,629)                 | (4,499,179)                           | (9,616,808)        |
| <b>Balance at 30 June 2015</b>          |         | <b>129,110,151</b>   | <b>(4,383,713)</b>          | <b>110,529,922</b>                    | <b>235,256,360</b> |

The notes on pages 14 to 39 form an integral part of these financial statements.

## 1.2.Consolidate Financial Statement, Centuria Office REIT Annual Report 2016

### Consolidated statement

For the year ended 30 June 2016

#### > Consolidated statement of profit or loss and other comprehensive income

|                                                                                                                | Note | 30 June 2016<br>(\$ '000) | 30 June 2015<br>(\$ '000) |
|----------------------------------------------------------------------------------------------------------------|------|---------------------------|---------------------------|
| <b>Revenue</b>                                                                                                 |      |                           |                           |
| Rent and recoverable outgoings                                                                                 |      | 39,536                    | 18,757                    |
| <b>Other income</b>                                                                                            |      |                           |                           |
| Interest income                                                                                                |      | 77                        | 104                       |
| Net gain on fair value of investment properties after write-down of stamp duty and other transaction costs     | 7    | 23,246                    | -                         |
| Gain on fair value of derivative financial instruments                                                         |      | -                         | 498                       |
| <b>Expenses</b>                                                                                                |      |                           |                           |
| Net loss on fair value of investment properties after write-down of stamp duty and other transaction costs     | 7    | -                         | (451)                     |
| Net loss on fair value of listed investments held at fair value through profit or loss after transaction costs | 8    | (113)                     | -                         |
| Loss on fair value of derivative financial instruments                                                         |      | (2,373)                   | -                         |
| Rates, taxes and other property outgoings                                                                      |      | (8,153)                   | (4,105)                   |
| Finance costs                                                                                                  |      | (4,427)                   | (3,928)                   |
| Incentive fees waived                                                                                          |      | -                         | 123                       |
| Management fees                                                                                                | 17   | (1,985)                   | (953)                     |
| Professional fees                                                                                              |      | (657)                     | (318)                     |
| Public Offer transaction costs                                                                                 |      | -                         | (660)                     |
| Other expenses                                                                                                 |      | (366)                     | (136)                     |
| <b>Profit from continuing operations for the year</b>                                                          |      | <b>44,785</b>             | <b>8,931</b>              |
| <b>Net profit for the year</b>                                                                                 |      | <b>44,785</b>             | <b>8,931</b>              |
| <b>Other comprehensive income</b>                                                                              |      |                           |                           |
| Other comprehensive income for the year                                                                        |      | -                         | -                         |
| <b>Total comprehensive income for the year</b>                                                                 |      | <b>44,785</b>             | <b>8,931</b>              |
| <b>Net profit attributable to:</b>                                                                             |      |                           |                           |
| Members of the Parent                                                                                          |      | 26,676                    | 7,091                     |
| Non-controlling interest- CMR2                                                                                 | 13   | 18,109                    | 1,840                     |
|                                                                                                                |      | <b>44,785</b>             | <b>8,931</b>              |
| <b>Total comprehensive income attributable to:</b>                                                             |      |                           |                           |
| Members of the Parent                                                                                          |      | 26,676                    | 7,091                     |
| Non-controlling interest- CMR2                                                                                 |      | 18,109                    | 1,840                     |
|                                                                                                                |      | <b>44,785</b>             | <b>8,931</b>              |
| <b>Basic and diluted earnings per CMA stapled security</b>                                                     |      |                           |                           |
| Stapled securities on issue (cents per stapled security)                                                       | 15   | 37.52                     | 16.12                     |
| <b>Basic and diluted earnings per CMR1 unit</b>                                                                |      |                           |                           |
| Units on issue (cents per unit)                                                                                | 15   | 22.35                     | 12.80                     |

The notes on pages 25 to 48 form an integral part of these financial statements.



## Consolidated statements

As at 30 June 2016

### > Consolidated statement of financial position

|                                                       | Note | 30 June 2016<br>(\$ '000) | 30 June 2015<br>(\$ '000) |
|-------------------------------------------------------|------|---------------------------|---------------------------|
| <b>Assets</b>                                         |      |                           |                           |
| <b>Current assets</b>                                 |      |                           |                           |
| Cash and cash equivalents                             | 5    | 4,911                     | 6,273                     |
| Trade and other receivables                           | 6    | 377                       | 232                       |
| Investments held at fair value through profit or loss | 8    | 11,113                    | -                         |
| Prepayments                                           |      | 432                       | 379                       |
| <b>Total current assets</b>                           |      | <b>16,833</b>             | <b>6,884</b>              |
| <b>Non-current assets</b>                             |      |                           |                           |
| Investment properties                                 | 7    | 398,730                   | 323,110                   |
| <b>Total non-current assets</b>                       |      | <b>398,730</b>            | <b>323,110</b>            |
| <b>Total assets</b>                                   |      | <b>415,563</b>            | <b>329,994</b>            |
| <b>Liabilities</b>                                    |      |                           |                           |
| <b>Current liabilities</b>                            |      |                           |                           |
| Trade and other payables                              | 9    | 11,225                    | 10,093                    |
| <b>Total current liabilities</b>                      |      | <b>11,225</b>             | <b>10,093</b>             |
| <b>Non-current liabilities</b>                        |      |                           |                           |
| Borrowings                                            | 10   | 141,090                   | 83,912                    |
| Derivative financial instruments                      | 11   | 3,106                     | 733                       |
| <b>Total non-current liabilities</b>                  |      | <b>144,196</b>            | <b>84,645</b>             |
| <b>Total liabilities</b>                              |      | <b>155,421</b>            | <b>94,738</b>             |
| <b>Net assets</b>                                     |      | <b>260,142</b>            | <b>235,256</b>            |
| <b>Equity</b>                                         |      |                           |                           |
| Issued capital                                        | 12   | 129,328                   | 129,110                   |
| Retained earnings/(accumulated losses)                |      | 11,564                    | (4,384)                   |
| Non-controlling interest- CMR2                        | 13   | 119,250                   | 110,530                   |
| <b>Total equity</b>                                   |      | <b>260,142</b>            | <b>235,256</b>            |

The notes on pages 25 to 48 form an integral part of these financial statements.

## For the year ended 30 June 2016

### > Consolidated statement of changes in equity

|                                                | Note    | Issued capital | Retained earnings/<br>(accumulated losses) | Non-controlling interest | Total equity   |
|------------------------------------------------|---------|----------------|--------------------------------------------|--------------------------|----------------|
|                                                |         | \$'000         | \$'000                                     | \$'000                   | \$'000         |
| Balance at 1 July 2014                         |         | 29,255         | (6,358)                                    | 20,269                   | 43,166         |
| Net profit for the year                        |         | -              | 7,091                                      | 1,840                    | 8,931          |
| Other comprehensive income                     |         | -              | -                                          | -                        | -              |
| <b>Total comprehensive income for the year</b> |         | <b>-</b>       | <b>7,091</b>                               | <b>1,840</b>             | <b>8,931</b>   |
| Applications                                   | 12 & 13 | 111,328        | -                                          | 103,084                  | 214,412        |
| Redemptions                                    | 12 & 13 | (7,308)        | -                                          | (6,325)                  | (13,633)       |
| Equity raising costs                           | 12 & 13 | (4,165)        | -                                          | (3,839)                  | (8,004)        |
| Distributions to security holders              | 14      | -              | (5,117)                                    | (4,499)                  | (9,616)        |
| <b>Balance at 30 June 2015</b>                 |         | <b>129,110</b> | <b>(4,384)</b>                             | <b>110,530</b>           | <b>235,256</b> |
| Net profit for the year                        |         | -              | 26,676                                     | 18,109                   | 44,785         |
| Other comprehensive income                     |         | -              | -                                          | -                        | -              |
| Total comprehensive income for the year        |         | -              | 26,676                                     | 18,109                   | 44,785         |
| Distributions reinvested                       | 12 & 13 | 265            | -                                          | 229                      | 494            |
| Equity raising costs                           | 12 & 13 | (47)           | -                                          | (47)                     | (94)           |
| Distributions to security holders              | 14      | -              | (10,728)                                   | (9,571)                  | (20,299)       |
| <b>Balance at 30 June 2016</b>                 |         | <b>129,328</b> | <b>11,564</b>                              | <b>119,250</b>           | <b>260,142</b> |

The notes on pages 25 to 48 form an integral part of these financial statements.

# Consolidated statements

## For the year ended 30 June 2016

### > Consolidated statement of cash flows

|                                                                    | Note     | 30 June 2016<br>(\$ '000) | 30 June 2015<br>(\$ '000) |
|--------------------------------------------------------------------|----------|---------------------------|---------------------------|
| <b>Cash flows from operating activities</b>                        |          |                           |                           |
| Receipts from customers                                            |          | 41,310                    | 20,130                    |
| Payments to suppliers                                              |          | (14,310)                  | (7,657)                   |
| Interest received                                                  |          | 81                        | 101                       |
| Interest paid                                                      |          | (4,175)                   | (3,722)                   |
| <b>Net cash generated by operating activities</b>                  | <b>5</b> | <b>22,906</b>             | <b>8,852</b>              |
| <b>Cash flows from investing activities</b>                        |          |                           |                           |
| Payments for investment properties                                 |          | (49,916)                  | (209,606)                 |
| Payments for investments held at fair value through profit or loss |          | (10,800)                  | -                         |
| <b>Net cash used in investing activities</b>                       |          | <b>(60,716)</b>           | <b>(209,606)</b>          |
| <b>Cash flows from financing activities</b>                        |          |                           |                           |
| Proceeds on issue of stapled securities                            |          | -                         | 214,411                   |
| Payments to procure issued stapled securities                      |          | (356)                     | (7,743)                   |
| Payments for redemption of stapled securities                      |          | -                         | (13,632)                  |
| Distributions paid                                                 |          | (20,181)                  | (4,659)                   |
| Proceeds from borrowings                                           |          | 57,417                    | 84,610                    |
| Repayment of borrowings                                            |          | -                         | (67,944)                  |
| Payments to procure borrowings                                     |          | (432)                     | (776)                     |
| <b>Net cash generated by financing activities</b>                  |          | <b>36,448</b>             | <b>204,267</b>            |
| <b>Net (decrease)/increase in cash and cash equivalents</b>        |          | <b>(1,362)</b>            | <b>3,513</b>              |
| Cash and cash equivalents at beginning of financial year           |          | 6,273                     | 2,760                     |
| <b>Cash and cash equivalents at end of financial year</b>          | <b>5</b> | <b>4,911</b>              | <b>6,273</b>              |

The notes on pages 25 to 48 form an integral part of these financial statements.

### 1.3. Consolidate Financial Statement, Centuria Office REIT Annual Report 2017

#### Consolidated statement of profit or loss and other comprehensive income

For the year ended 30 June 2017

|                                                                                                                | Note | 30 Jun 2017<br>\$'000 | 30 Jun 2016<br>\$'000 |
|----------------------------------------------------------------------------------------------------------------|------|-----------------------|-----------------------|
| <b>Revenue</b>                                                                                                 |      |                       |                       |
| Rent and recoverable outgoings                                                                                 |      | 41,385                | 39,536                |
| <b>Other income</b>                                                                                            |      |                       |                       |
| Interest income                                                                                                |      | 115                   | 77                    |
| Net gain on fair value of investment properties after write-down of stamp duty and other transaction costs     | 8    | 17,180                | 23,246                |
| Gain on fair value of investments held at fair value through profit or loss                                    | 9    | 884                   | –                     |
| Gain on fair value of derivative financial instruments                                                         |      | 1,420                 | –                     |
| Other income                                                                                                   |      | 14                    |                       |
| <b>Expenses</b>                                                                                                |      |                       |                       |
| Net loss on fair value of listed investments held at fair value through profit or loss after transaction costs | 9    | –                     | (113)                 |
| Loss on fair value of derivative financial instruments                                                         |      | –                     | (2,373)               |
| Rates, taxes and other property outgoings                                                                      |      | (9,302)               | (8,153)               |
| Finance costs                                                                                                  | 4    | (5,863)               | (4,427)               |
| Management fees                                                                                                | 21   | (2,385)               | (1,985)               |
| Professional fees                                                                                              |      | (787)                 | (657)                 |
| Transaction costs                                                                                              |      | (4,263)               | –                     |
| Other expenses                                                                                                 |      | (709)                 | (366)                 |
| <b>Profit from continuing operations for the year</b>                                                          |      | <b>37,689</b>         | <b>44,785</b>         |
| <b>Net profit for the year</b>                                                                                 |      | <b>37,689</b>         | <b>44,785</b>         |
| <b>Other comprehensive income</b>                                                                              |      |                       |                       |
| <b>Total comprehensive income for the year</b>                                                                 |      | <b>37,689</b>         | <b>44,785</b>         |
| <b>Net profit attributable to:</b>                                                                             |      |                       |                       |
| Members of the Parent                                                                                          |      | 27,309                | 26,676                |
| Non-controlling interest – CMR2                                                                                | 16   | 10,380                | 18,109                |
|                                                                                                                |      | <b>37,689</b>         | <b>44,785</b>         |
| <b>Total comprehensive income attributable to:</b>                                                             |      |                       |                       |
| Members of the Parent                                                                                          |      | 27,309                | 26,676                |
| Non-controlling interest – CMR2                                                                                |      | 10,380                | 18,109                |
|                                                                                                                |      | <b>37,689</b>         | <b>44,785</b>         |
| <b>Basic and diluted earnings per CMA security</b>                                                             |      |                       |                       |
| Securities on issue (cents per security)                                                                       | 6    | 31.48                 | 37.52                 |
| <b>Basic and diluted earnings per CMR1 unit</b>                                                                |      |                       |                       |
| Units on issue (cents per unit)                                                                                | 6    | 22.81                 | 22.35                 |

The above consolidated statement of profit and loss and other comprehensive income should be read in conjunction with the accompanying notes.

## Consolidated statement of changes in equity

For the year ended 30 June 2017

|                                           | Note    | Issued capital<br>\$'000 | Retained earnings/<br>(accumulated losses)<br>\$'000 | Non-controlling interest<br>\$'000 | Total equity<br>\$'000 |
|-------------------------------------------|---------|--------------------------|------------------------------------------------------|------------------------------------|------------------------|
| Balance at 1 July 2015                    |         | 129,110                  | (4,384)                                              | 110,530                            | 235,256                |
| Net profit for the year                   |         | –                        | 26,676                                               | 18,109                             | 44,785                 |
| Total comprehensive income for the year   |         | –                        | 26,676                                               | 18,109                             | 44,785                 |
| Distributions reinvested                  | 15 & 16 | 265                      | –                                                    | 229                                | 494                    |
| Equity raising costs                      | 15 & 16 | (47)                     | –                                                    | (47)                               | (94)                   |
| Distributions to security holders         | 5       | –                        | (10,728)                                             | (9,571)                            | (20,299)               |
| <b>Balance at 30 June 2016</b>            |         | <b>129,328</b>           | <b>11,564</b>                                        | <b>119,250</b>                     | <b>260,142</b>         |
| Net profit for the year                   |         | –                        | 27,309                                               | 10,380                             | 37,689                 |
| Total comprehensive income for the year   |         | –                        | 27,309                                               | 10,380                             | 37,689                 |
| CMR2 applications – 22 Mar 2017           | 15 & 16 | 124,704                  | –                                                    | –                                  | 124,704                |
| CUA unitholder applications – 29 Jun 2017 | 15 & 16 | 144,142                  | –                                                    | –                                  | 144,142                |
| Total applications for the year           |         | 268,846                  | –                                                    | –                                  | 268,846                |
| Redemptions                               | 15 & 16 | –                        | –                                                    | (124,704)                          | (124,704)              |
| Equity raising costs                      | 15 & 16 | (537)                    | –                                                    | –                                  | (537)                  |
| Distributions to security holders         | 5       | –                        | (15,971)                                             | (4,926)                            | (20,897)               |
| <b>Balance at 30 June 2017</b>            |         | <b>397,637</b>           | <b>22,902</b>                                        | <b>–</b>                           | <b>420,539</b>         |

The above consolidated statement of changes in equity should be read in conjunction with the accompanying notes.

## Consolidated statement of financial position

As at 30 June 2017

|                                                       | Note | 30 Jun 2017<br>\$'000 | 30 Jun 2016<br>\$'000 |
|-------------------------------------------------------|------|-----------------------|-----------------------|
| <b>Assets</b>                                         |      |                       |                       |
| <b>Current assets</b>                                 |      |                       |                       |
| Cash and cash equivalents                             | 18   | 8,187                 | 4,911                 |
| Trade and other receivables                           | 7    | 1,127                 | 377                   |
| Investments held at fair value through profit or loss | 9    | –                     | 11,113                |
| Prepayments                                           |      | 490                   | 432                   |
| <b>Total current assets</b>                           |      | <b>9,804</b>          | <b>16,833</b>         |
| <b>Non-current assets</b>                             |      |                       |                       |
| Investment properties                                 | 8    | 609,950               | 398,730               |
| Goodwill                                              | 10   | 6,356                 | –                     |
| Other assets                                          | 11   | 2,912                 | –                     |
| <b>Total non-current assets</b>                       |      | <b>619,218</b>        | <b>398,730</b>        |
| <b>Total assets</b>                                   |      | <b>629,022</b>        | <b>415,563</b>        |
| <b>Liabilities</b>                                    |      |                       |                       |
| <b>Current liabilities</b>                            |      |                       |                       |
| Trade and other payables                              | 12   | 18,753                | 11,225                |
| Derivative financial instruments                      | 14   | 1,988                 | –                     |
| <b>Total current liabilities</b>                      |      | <b>20,741</b>         | <b>11,225</b>         |
| <b>Non-current liabilities</b>                        |      |                       |                       |
| Borrowings                                            | 13   | 187,742               | 141,090               |
| Derivative financial instruments                      | 14   | –                     | 3,106                 |
| <b>Total non-current liabilities</b>                  |      | <b>187,742</b>        | <b>144,196</b>        |
| <b>Total liabilities</b>                              |      | <b>208,483</b>        | <b>155,421</b>        |
| <b>Net assets</b>                                     |      | <b>420,539</b>        | <b>260,142</b>        |
| <b>Equity</b>                                         |      |                       |                       |
| Issued capital                                        | 15   | 397,637               | 129,328               |
| Retained earnings                                     |      | 22,902                | 11,564                |
| Non-controlling interest – CMR2                       | 16   | –                     | 119,250               |
| <b>Total equity</b>                                   |      | <b>420,539</b>        | <b>260,142</b>        |

The above consolidated statement of financial position should be read in conjunction with the accompanying notes.

## Consolidated statement of cash flows

For the year ended 30 June 2017

|                                                                             | Note | 30 Jun 2017<br>\$'000 | 30 Jun 2016<br>\$'000 |
|-----------------------------------------------------------------------------|------|-----------------------|-----------------------|
| <b>Cash flows from operating activities</b>                                 |      |                       |                       |
| Receipts from customers                                                     |      | 43,150                | 41,310                |
| Payments to suppliers                                                       |      | (16,158)              | (14,310)              |
| Distributions received                                                      |      | 414                   | –                     |
| Interest received                                                           |      | 115                   | 81                    |
| Interest paid                                                               |      | (5,516)               | (4,175)               |
| <b>Net cash generated by operating activities</b>                           | 18   | 22,005                | 22,906                |
| <b>Cash flows from investing activities</b>                                 |      |                       |                       |
| Proceeds from sale of investment properties                                 |      | 26,000                | –                     |
| Payments for investment properties                                          |      | (8,863)               | (49,916)              |
| Proceeds from sale of investments held at fair value through profit or loss |      | 11,202                | –                     |
| Payments for investments held at fair value through profit or loss          |      | (599)                 | (10,800)              |
| Purchase of subsidiaries                                                    |      | (27,251)              | –                     |
| Transaction costs                                                           |      | (587)                 | –                     |
| <b>Net cash used in investing activities</b>                                |      | (98)                  | (60,716)              |
| <b>Cash flows from financing activities</b>                                 |      |                       |                       |
| Payments to procure issued units                                            |      | –                     | (356)                 |
| Distributions paid                                                          |      | (20,748)              | (20,181)              |
| Proceeds from borrowings                                                    |      | 3,675                 | 57,417                |
| Payments to procure borrowings                                              |      | (1,214)               | (432)                 |
| Payments for derivative financial instruments                               |      | (344)                 | –                     |
| <b>Net cash (used in)/generated by financing activities</b>                 |      | (18,631)              | 36,448                |
| <b>Net increase/(decrease) in cash and cash equivalents</b>                 |      | 3,276                 | (1,362)               |
| Cash and cash equivalents at beginning of financial year                    |      | 4,911                 | 6,273                 |
| <b>Cash and cash equivalents at end of financial year</b>                   | 18   | 8,187                 | 4,911                 |

The above consolidated statement of cash flows should be read in conjunction with the accompanying notes.

## 1.4. Consolidate Financial Statement, Centuria Office REIT Annual Report 2018

### Consolidated statement of profit or loss and other comprehensive income

For the year ended 30 June 2018

|                                                                             | Note | 30 Jun 2018<br>\$'000 | 30 Jun 2017<br>\$'000 |
|-----------------------------------------------------------------------------|------|-----------------------|-----------------------|
| <b>Revenue</b>                                                              |      |                       |                       |
| Rent and recoverable outgoings                                              | B2   | 77,025                | 41,385                |
| <b>Total revenue from continuing operations</b>                             |      | <b>77,025</b>         | <b>41,385</b>         |
| <b>Other income</b>                                                         |      |                       |                       |
| Interest income                                                             |      | 195                   | 115                   |
| Net gain on fair value of investment properties                             | C2   | 41,957                | 17,180                |
| Gain on fair value of investments held at fair value through profit or loss | C4   | -                     | 884                   |
| (Loss)/gain on fair value of derivative financial instruments               |      | (646)                 | 1,420                 |
| Other income                                                                |      | 27                    | 14                    |
| <b>Total other income</b>                                                   |      | <b>41,533</b>         | <b>19,613</b>         |
| <b>Total revenue from continuing operations and other income</b>            |      | <b>118,558</b>        | <b>60,998</b>         |
| <b>Expenses</b>                                                             |      |                       |                       |
| Rates, taxes and other property outgoings                                   |      | 18,215                | 9,302                 |
| Finance costs                                                               | B3   | 9,010                 | 5,863                 |
| Management fees                                                             | D2   | 4,192                 | 2,385                 |
| Professional fees                                                           |      | 1,220                 | 787                   |
| Transaction costs                                                           |      | 14                    | 4,263                 |
| Other expenses                                                              |      | 825                   | 709                   |
| <b>Profit from continuing operations for the year</b>                       |      | <b>85,082</b>         | <b>37,689</b>         |
| <b>Net profit for the year</b>                                              |      | <b>85,082</b>         | <b>37,689</b>         |
| <b>Other comprehensive income</b>                                           |      |                       |                       |
| Other comprehensive income for the year                                     |      | -                     | -                     |
| <b>Total comprehensive income for the year</b>                              | B4   | <b>85,082</b>         | <b>37,689</b>         |
| <b>Basic and diluted earnings per unit</b>                                  |      |                       |                       |
| Basic earnings per unit (cents per unit)                                    | B4   | 37.4                  | 31.5                  |

The above consolidated statement of profit or loss and other comprehensive income should be read in conjunction with the accompanying notes.



## Consolidated statement of changes in equity

For the year ended 30 June 2018

|                                                | Note | Issued capital<br>\$'000 | Retained earnings/<br>(accumulated losses)<br>\$'000 | Non-controlling interest<br>\$'000 | Total equity<br>\$'000 |
|------------------------------------------------|------|--------------------------|------------------------------------------------------|------------------------------------|------------------------|
| <b>Balance at 1 July 2016</b>                  |      | <b>129,328</b>           | <b>11,564</b>                                        | <b>119,250</b>                     | <b>260,142</b>         |
| Net profit for the year                        |      | -                        | 27,309                                               | 10,380                             | 37,689                 |
| <b>Total comprehensive income for the year</b> |      | <b>-</b>                 | <b>27,309</b>                                        | <b>10,380</b>                      | <b>37,689</b>          |
| CMR2 applications - 22 Mar 2017                |      | 124,704                  | -                                                    | -                                  | 124,704                |
| CUA unitholder applications - 29 Jun 2017      |      | 144,142                  | -                                                    | -                                  | 144,142                |
| Redemptions                                    |      | -                        | -                                                    | (124,704)                          | (124,704)              |
| Equity raising costs                           |      | (537)                    | -                                                    | -                                  | (537)                  |
| Distributions to unitholders                   | B1   | -                        | (15,971)                                             | (4,926)                            | (20,897)               |
| <b>Balance at 30 June 2017</b>                 |      | <b>397,637</b>           | <b>22,902</b>                                        | <b>-</b>                           | <b>420,539</b>         |
| <b>Balance at 1 July 2017</b>                  |      | <b>397,637</b>           | <b>22,902</b>                                        | <b>-</b>                           | <b>420,539</b>         |
| Net profit for the year                        |      | -                        | 85,082                                               | -                                  | 85,082                 |
| <b>Total comprehensive income for the year</b> |      | <b>-</b>                 | <b>85,082</b>                                        | <b>-</b>                           | <b>85,082</b>          |
| Units issued                                   | C10  | 150,450                  | -                                                    | -                                  | 150,450                |
| Equity raising costs                           | C10  | (5,131)                  | -                                                    | -                                  | (5,131)                |
| Distributions provided for or paid             | B1   | -                        | (42,740)                                             | -                                  | (42,740)               |
| Distribution reinvestment plan ('DRP')         | C10  | 2,272                    | -                                                    | -                                  | 2,272                  |
| <b>Balance at 30 June 2018</b>                 |      | <b>545,228</b>           | <b>65,244</b>                                        | <b>-</b>                           | <b>610,472</b>         |

The above consolidated statement of changes in equity should be read in conjunction with the accompanying notes.

## Consolidated statement of financial position

As at 30 June 2018

|                                      | Note   | 30 Jun 2018<br>\$'000 | 30 Jun 2017<br>\$'000 |
|--------------------------------------|--------|-----------------------|-----------------------|
| <b>ASSETS</b>                        |        |                       |                       |
| <b>Current assets</b>                |        |                       |                       |
| Cash and cash equivalents            | C12    | 18,978                | 8,187                 |
| Trade and other receivables          | C1     | 1,325                 | 1,127                 |
| Other assets                         |        | 940                   | 490                   |
| Investment properties held for sale  | C3     | 36,000                | -                     |
| <b>Total current assets</b>          |        | <b>57,243</b>         | <b>9,804</b>          |
| <b>Non-current assets</b>            |        |                       |                       |
| Investment properties                | C2     | 836,300               | 609,950               |
| Intangibles                          | C5, D1 | 6,356                 | 6,356                 |
| Other non-current assets             | C6     | 2,912                 | 2,912                 |
| <b>Total non-current assets</b>      |        | <b>845,568</b>        | <b>619,218</b>        |
| <b>Total assets</b>                  |        | <b>902,811</b>        | <b>629,022</b>        |
| <b>LIABILITIES</b>                   |        |                       |                       |
| <b>Current liabilities</b>           |        |                       |                       |
| Trade and other payables             | C7     | 25,950                | 18,753                |
| Derivative financial instruments     | C9     | -                     | 1,988                 |
| <b>Total current liabilities</b>     |        | <b>25,950</b>         | <b>20,741</b>         |
| <b>Non-current liabilities</b>       |        |                       |                       |
| Borrowings                           | C8     | 265,961               | 187,742               |
| Derivative financial instruments     | C9     | 428                   | -                     |
| <b>Total non-current liabilities</b> |        | <b>266,389</b>        | <b>187,742</b>        |
| <b>Total liabilities</b>             |        | <b>292,339</b>        | <b>208,483</b>        |
| <b>Net assets</b>                    |        | <b>610,472</b>        | <b>420,539</b>        |
| <b>EQUITY</b>                        |        |                       |                       |
| Issued capital                       | C10    | 545,228               | 397,637               |
| Retained earnings                    |        | 65,244                | 22,902                |
| <b>Total equity</b>                  |        | <b>610,472</b>        | <b>420,539</b>        |

The above consolidated statement of financial position should be read in conjunction with the accompanying notes.

## Consolidated statement of cash flows

For the year ended 30 June 2018

|                                                                             | Note | 30 Jun 2018<br>\$'000 | 30 Jun 2017<br>\$'000 |
|-----------------------------------------------------------------------------|------|-----------------------|-----------------------|
| <b>Cash flows from operating activities</b>                                 |      |                       |                       |
| Receipts from customers                                                     |      | 85,619                | 43,150                |
| Payments to suppliers                                                       |      | (28,582)              | (16,158)              |
| Distribution received                                                       |      | -                     | 414                   |
| Interest received                                                           |      | 195                   | 115                   |
| Interest paid                                                               |      | (8,079)               | (5,516)               |
| <b>Net cash generated by operating activities</b>                           | C12  | <b>49,153</b>         | <b>22,005</b>         |
| <b>Cash flows from investing activities</b>                                 |      |                       |                       |
| Proceeds from sale of investment properties                                 |      | 10,008                | 26,000                |
| Payments for investment properties                                          |      | (231,929)             | (8,863)               |
| Proceeds from sale of investments held at fair value through profit or loss |      | -                     | 11,202                |
| Payments for investments held at fair value through profit or loss          |      | -                     | (599)                 |
| Purchase of subsidiaries                                                    |      | -                     | (27,251)              |
| Transaction cost                                                            |      | -                     | (587)                 |
| <b>Net cash used in investing activities</b>                                |      | <b>(221,921)</b>      | <b>(98)</b>           |
| <b>Cash flows from financing activities</b>                                 |      |                       |                       |
| Distribution paid                                                           |      | (37,213)              | (20,748)              |
| Payments for borrowing costs                                                |      | (368)                 | (1,214)               |
| Proceeds from borrowings                                                    |      | 143,027               | 3,675                 |
| Repayment of borrowings                                                     |      | (65,000)              | -                     |
| Payments for derivative financial instruments                               |      | (2,206)               | (344)                 |
| Proceeds from issue of units                                                |      | 150,450               | -                     |
| Equity issue costs                                                          |      | (5,131)               | -                     |
| <b>Net cash generated by/(used in) financing activities</b>                 |      | <b>183,559</b>        | <b>(18,631)</b>       |
| <b>Net increase in cash and cash equivalents</b>                            |      | <b>10,791</b>         | <b>3,276</b>          |
| Cash and cash equivalents at beginning of financial year                    |      | 8,187                 | 4,911                 |
| <b>Cash and cash equivalents at end of financial year</b>                   | C12  | <b>18,978</b>         | <b>8,187</b>          |

The above consolidated statement of cash flows should be read in conjunction with the accompanying notes.

## 1.5. Consolidate Financial Statement, Centuria Office REIT Annual Report 2019

### Consolidated statement of profit or loss and other comprehensive income

For the year ended 30 June 2019

|                                                                  | Note      | 30 Jun 2019<br>\$'000 | 30 Jun 2018<br>\$'000 |
|------------------------------------------------------------------|-----------|-----------------------|-----------------------|
| <b>Revenue</b>                                                   |           |                       |                       |
| Rent and recoverable outgoings                                   | B2        | 108,859               | 77,049                |
| <b>Total revenue from continuing operations</b>                  |           | <b>108,859</b>        | <b>77,049</b>         |
| <b>Other income</b>                                              |           |                       |                       |
| Interest income                                                  |           | 334                   | 195                   |
| Net gain on fair value of investment properties                  | C2        | 7,143                 | 41,957                |
| Other income                                                     |           | 8                     | 27                    |
| <b>Total other income</b>                                        |           | <b>7,485</b>          | <b>42,179</b>         |
| <b>Total revenue from continuing operations and other income</b> |           | <b>116,344</b>        | <b>119,228</b>        |
| <b>Expenses</b>                                                  |           |                       |                       |
| Rates, taxes and other property outgoings                        |           | 25,498                | 18,537                |
| Finance costs                                                    | B3        | 22,110                | 9,010                 |
| Loss on fair value of derivative financial instruments           |           | 6,752                 | 646                   |
| Management fees                                                  | D2        | 6,867                 | 4,192                 |
| Other expenses                                                   |           | 1,142                 | 1,313                 |
| Transaction costs                                                |           | 403                   | 448                   |
| <b>Profit from continuing operations for the year</b>            |           | <b>53,572</b>         | <b>85,082</b>         |
| <b>Net profit for the year</b>                                   |           | <b>53,572</b>         | <b>85,082</b>         |
| <b>Other comprehensive income</b>                                |           |                       |                       |
| Other comprehensive income for the period                        |           | -                     | -                     |
| <b>Total comprehensive income for the period</b>                 |           | <b>53,572</b>         | <b>85,082</b>         |
| <b>Basic and diluted earnings per unit</b>                       |           |                       |                       |
| <b>Basic earnings per unit (cents per unit)</b>                  | <b>B4</b> | <b>16.3</b>           | <b>37.4</b>           |

The above consolidated statement of profit or loss and other comprehensive income should be read in conjunction with the accompanying notes.

# Consolidated statement of financial position

As at 30 June 2019

|                                      | Note | 30 Jun 2019<br>\$'000 | 30 Jun 2018<br>\$'000 |
|--------------------------------------|------|-----------------------|-----------------------|
| <b>ASSETS</b>                        |      |                       |                       |
| <b>Current assets</b>                |      |                       |                       |
| Cash and cash equivalents            | C11  | 17,546                | 18,978                |
| Trade and other receivables          | C1   | 4,080                 | 1,325                 |
| Other assets                         |      | 1,464                 | 940                   |
| Investment properties held for sale  | C3   | 78,500                | 36,000                |
| <b>Total current assets</b>          |      | <b>101,590</b>        | <b>57,243</b>         |
| <b>Non-current assets</b>            |      |                       |                       |
| Investment properties                | C2   | 1,321,475             | 836,300               |
| Intangibles                          | C4   | 6,356                 | 6,356                 |
| Other non-current assets             | C5   | -                     | 2,912                 |
| <b>Total non-current assets</b>      |      | <b>1,327,831</b>      | <b>845,568</b>        |
| <b>Total assets</b>                  |      | <b>1,429,421</b>      | <b>902,811</b>        |
| <b>LIABILITIES</b>                   |      |                       |                       |
| <b>Current liabilities</b>           |      |                       |                       |
| Trade and other payables             | C6   | 14,924                | 14,964                |
| Distributions payable                | B1   | 15,527                | 10,986                |
| <b>Total current liabilities</b>     |      | <b>30,451</b>         | <b>25,950</b>         |
| <b>Non-current liabilities</b>       |      |                       |                       |
| Borrowings                           | C7   | 497,222               | 265,961               |
| Derivative financial instruments     | C8   | 7,180                 | 428                   |
| <b>Total non-current liabilities</b> |      | <b>504,402</b>        | <b>266,389</b>        |
| <b>Total liabilities</b>             |      | <b>534,853</b>        | <b>292,339</b>        |
| <b>Net assets</b>                    |      | <b>894,568</b>        | <b>610,472</b>        |
| <b>EQUITY</b>                        |      |                       |                       |
| Issued capital                       | C9   | 833,320               | 545,228               |
| Retained earnings                    |      | 61,248                | 65,244                |
| <b>Total equity</b>                  |      | <b>894,568</b>        | <b>610,472</b>        |

The above consolidated statement of financial position should be read in conjunction with the accompanying notes.

## Consolidated statement of changes in equity

For the year ended 30 June 2019

|                                                | Note | Issued<br>capital<br>\$'000 | Retained earnings/<br>(accumulated losses)<br>\$'000 | Total<br>equity<br>\$'000 |
|------------------------------------------------|------|-----------------------------|------------------------------------------------------|---------------------------|
| <b>Balance at 1 July 2017</b>                  |      | <b>397,637</b>              | <b>22,902</b>                                        | <b>420,539</b>            |
| Net profit for the year                        |      | -                           | 85,082                                               | 85,082                    |
| <b>Total comprehensive income for the year</b> |      | <b>-</b>                    | <b>85,082</b>                                        | <b>85,082</b>             |
| Units issued                                   |      | 150,450                     | -                                                    | 150,450                   |
| Distribution reinvestment plan ('DRP')         |      | 2,272                       | -                                                    | 2,272                     |
| Equity raising costs                           |      | (5,131)                     | -                                                    | (5,131)                   |
| Distributions provided for or paid             | B1   | -                           | (42,740)                                             | (42,740)                  |
| <b>Balance at 30 June 2018</b>                 |      | <b>545,228</b>              | <b>65,244</b>                                        | <b>610,472</b>            |
| <b>Balance at 1 July 2018</b>                  |      | <b>545,228</b>              | <b>65,244</b>                                        | <b>610,472</b>            |
| Net profit for the year                        |      | -                           | 53,572                                               | 53,572                    |
| <b>Total comprehensive income for the year</b> |      | <b>-</b>                    | <b>53,572</b>                                        | <b>53,572</b>             |
| Units issued                                   | C9   | 275,845                     | -                                                    | 275,845                   |
| Equity raising costs                           | C9   | (7,753)                     | -                                                    | (7,753)                   |
| Distributions provided for or paid             | B1   | -                           | (57,568)                                             | (57,568)                  |
| Contribution from manager                      | C9   | 20,000                      | -                                                    | 20,000                    |
| <b>Balance at 30 June 2019</b>                 |      | <b>833,320</b>              | <b>61,248</b>                                        | <b>894,568</b>            |

The above consolidated statement of changes in equity should be read in conjunction with the accompanying notes.

# Consolidated statement of cash flows

For the year ended 30 June 2019

|                                                             | Note | 30 Jun 2019<br>\$'000 | 30 Jun 2018<br>\$'000 |
|-------------------------------------------------------------|------|-----------------------|-----------------------|
| <b>Cash flows from operating activities</b>                 |      |                       |                       |
| Receipts from customers                                     |      | 117,752               | 85,619                |
| Payments to suppliers                                       |      | (41,382)              | (28,582)              |
| Interest received                                           |      | 334                   | 195                   |
| Interest paid                                               |      | (19,158)              | (8,079)               |
| <b>Net cash generated by operating activities</b>           | C11  | <b>57,546</b>         | <b>49,153</b>         |
| <b>Cash flows from investing activities</b>                 |      |                       |                       |
| Proceeds from sale of investment properties                 |      | 56,038                | 10,008                |
| Payments for investment properties                          |      | (578,525)             | (231,929)             |
| <b>Net cash used in investing activities</b>                |      | <b>(522,487)</b>      | <b>(221,921)</b>      |
| <b>Cash flows from financing activities</b>                 |      |                       |                       |
| Distribution paid                                           |      | (53,027)              | (37,213)              |
| Payments for borrowing costs                                |      | (2,507)               | (368)                 |
| Proceeds from borrowings                                    |      | 524,951               | 143,027               |
| Repayment of borrowings                                     |      | (294,000)             | (65,000)              |
| Payments for derivative financial instruments               |      | -                     | (2,206)               |
| Equity issue costs                                          |      | (7,753)               | -                     |
| Contribution from manager                                   |      | 20,000                | -                     |
| Proceeds from issue of units                                |      | 275,845               | 150,450               |
| Equity issue costs                                          |      | -                     | (5,131)               |
| <b>Net cash generated by financing activities</b>           |      | <b>463,509</b>        | <b>183,559</b>        |
| <b>Net (decrease)/increase in cash and cash equivalents</b> |      | <b>(1,432)</b>        | <b>10,791</b>         |
| Cash and cash equivalents at beginning of financial period  |      | 18,978                | 8,187                 |
| <b>Cash and cash equivalents at end of financial year</b>   | C11  | <b>17,546</b>         | <b>18,978</b>         |

The above consolidated statement of cash flows should be read in conjunction with the accompanying notes.

## 1.6. Consolidate Financial Statement, Centuria Office REIT Annual Report 2020

### Consolidated statement of profit or loss and other comprehensive income

For the year ended 30 June 2020

|                                                                  | Note | 30 Jun 2020<br>\$'000 | 30 Jun 2019<br>\$'000 |
|------------------------------------------------------------------|------|-----------------------|-----------------------|
| <b>REVENUE</b>                                                   |      |                       |                       |
| Rent and recoverable outgoings                                   | B2   | 146,314               | 108,859               |
| <b>Total revenue from continuing operations</b>                  |      | <b>146,314</b>        | <b>108,859</b>        |
| <b>OTHER INCOME</b>                                              |      |                       |                       |
| Interest income                                                  |      | 106                   | 334                   |
| Other income                                                     |      | -                     | 8                     |
| <b>Total other income</b>                                        |      | <b>106</b>            | <b>342</b>            |
| <b>Total revenue from continuing operations and other income</b> |      | <b>146,420</b>        | <b>109,201</b>        |
| <b>EXPENSES</b>                                                  |      |                       |                       |
| Rates, taxes and other property outgoings                        |      | 35,638                | 25,498                |
| Loss/(gain) on fair value of investment properties               | C2   | 37,698                | (7,143)               |
| Finance costs                                                    | B3   | 22,719                | 22,110                |
| Management fees                                                  | D2   | 10,421                | 6,867                 |
| Goodwill Impairment Expense                                      | C4   | 6,356                 | -                     |
| Loss on fair value of derivative financial instruments           |      | 4,876                 | 6,752                 |
| Other expenses                                                   |      | 2,379                 | 1,142                 |
| Expected credit loss expense                                     | C1   | 1,694                 | -                     |
| Rental waivers expense                                           |      | 1,538                 | -                     |
| Transaction costs                                                |      | 48                    | 403                   |
| <b>Profit from continuing operations for the year</b>            |      | <b>23,053</b>         | <b>53,572</b>         |
| <b>Net profit for the year</b>                                   |      | <b>23,053</b>         | <b>53,572</b>         |
| <b>OTHER COMPREHENSIVE INCOME</b>                                |      |                       |                       |
| Other comprehensive income for the year                          |      | -                     | -                     |
| <b>Total comprehensive income for the year</b>                   |      | <b>23,053</b>         | <b>53,572</b>         |
| <b>BASIC AND DILUTED EARNINGS PER UNIT</b>                       |      |                       |                       |
| <b>Basic earnings per unit (cents per unit)</b>                  | B4   | <b>5.0</b>            | <b>16.3</b>           |

The above consolidated statement of profit or loss and other comprehensive income should be read in conjunction with the accompanying notes.



# Consolidated statement of financial position

As at 30 June 2020

|                                        | Note | 30 Jun 2020<br>\$'000 | 30 Jun 2019<br>\$'000 |
|----------------------------------------|------|-----------------------|-----------------------|
| <b>ASSETS</b>                          |      |                       |                       |
| <b>Current assets</b>                  |      |                       |                       |
| Cash and cash equivalents              | C10  | 28,809                | 17,546                |
| Trade and other receivables            | C1   | 3,263                 | 4,080                 |
| Other assets                           |      | 1,536                 | 1,464                 |
| Investment properties held for sale    | C3   | -                     | 78,500                |
| <b>Total current assets</b>            |      | <b>33,608</b>         | <b>101,590</b>        |
| <b>Non-current assets</b>              |      |                       |                       |
| Investment properties                  | C2   | 2,085,650             | 1,321,475             |
| Intangibles                            | C4   | -                     | 6,356                 |
| <b>Total non-current assets</b>        |      | <b>2,085,650</b>      | <b>1,327,831</b>      |
| <b>Total assets</b>                    |      | <b>2,119,258</b>      | <b>1,429,421</b>      |
| <b>LIABILITIES</b>                     |      |                       |                       |
| <b>Current liabilities</b>             |      |                       |                       |
| Trade and other payables               | C5   | 22,260                | 14,924                |
| Distributions payable                  | B1   | 22,896                | 15,527                |
| <b>Total current liabilities</b>       |      | <b>45,156</b>         | <b>30,451</b>         |
| <b>Non-current liabilities</b>         |      |                       |                       |
| Borrowings                             | C6   | 746,372               | 497,222               |
| Derivative financial instruments       | C7   | 12,056                | 7,180                 |
| Lease liability                        | C2   | 32,722                | -                     |
| <b>Total non-current liabilities</b>   |      | <b>791,150</b>        | <b>504,402</b>        |
| <b>Total liabilities</b>               |      | <b>836,306</b>        | <b>534,853</b>        |
| <b>Net assets</b>                      |      | <b>1,282,952</b>      | <b>894,568</b>        |
| <b>EQUITY</b>                          |      |                       |                       |
| Issued capital                         | C8   | 1,283,138             | 833,320               |
| (Accumulated losses)/Retained earnings |      | (186)                 | 61,248                |
| <b>Total equity</b>                    |      | <b>1,282,952</b>      | <b>894,568</b>        |

The above consolidated statement of financial position should be read in conjunction with the accompanying notes.

## Consolidated statement of changes in equity

For the year ended 30 June 2020

|                                         | Note | Issued capital<br>\$'000 | Retained earnings/<br>(accumulated losses)<br>\$'000 | Total equity<br>\$'000 |
|-----------------------------------------|------|--------------------------|------------------------------------------------------|------------------------|
| <b>Balance at 1 July 2018</b>           |      | <b>545,228</b>           | <b>65,244</b>                                        | <b>610,472</b>         |
| Net profit for the year                 |      | -                        | 53,572                                               | 53,572                 |
| Total comprehensive income for the year |      | -                        | <b>53,572</b>                                        | <b>53,572</b>          |
| Units issued                            |      | 275,845                  | -                                                    | 275,845                |
| Equity raising costs                    |      | (7,753)                  | -                                                    | (7,753)                |
| Distributions provided for or paid      | B1   | -                        | (57,568)                                             | (57,568)               |
| Contribution from manager               |      | 20,000                   | -                                                    | 20,000                 |
| <b>Balance at 30 June 2019</b>          |      | <b>833,320</b>           | <b>61,248</b>                                        | <b>894,568</b>         |
| <b>Balance at 1 July 2019</b>           |      | <b>833,320</b>           | <b>61,248</b>                                        | <b>894,568</b>         |
| Net profit for the year                 |      | -                        | 23,053                                               | 23,053                 |
| Total comprehensive income for the year |      | -                        | <b>23,053</b>                                        | <b>23,053</b>          |
| Units issued                            | C8   | 461,299                  | -                                                    | 461,299                |
| Equity raising costs                    | C8   | (11,481)                 | -                                                    | (11,481)               |
| Distributions provided for or paid      | B1   | -                        | (84,487)                                             | (84,487)               |
| <b>Balance at 30 June 2020</b>          |      | <b>1,283,138</b>         | <b>(186)</b>                                         | <b>1,282,952</b>       |

The above consolidated statement of changes in equity should be read in conjunction with the accompanying notes.

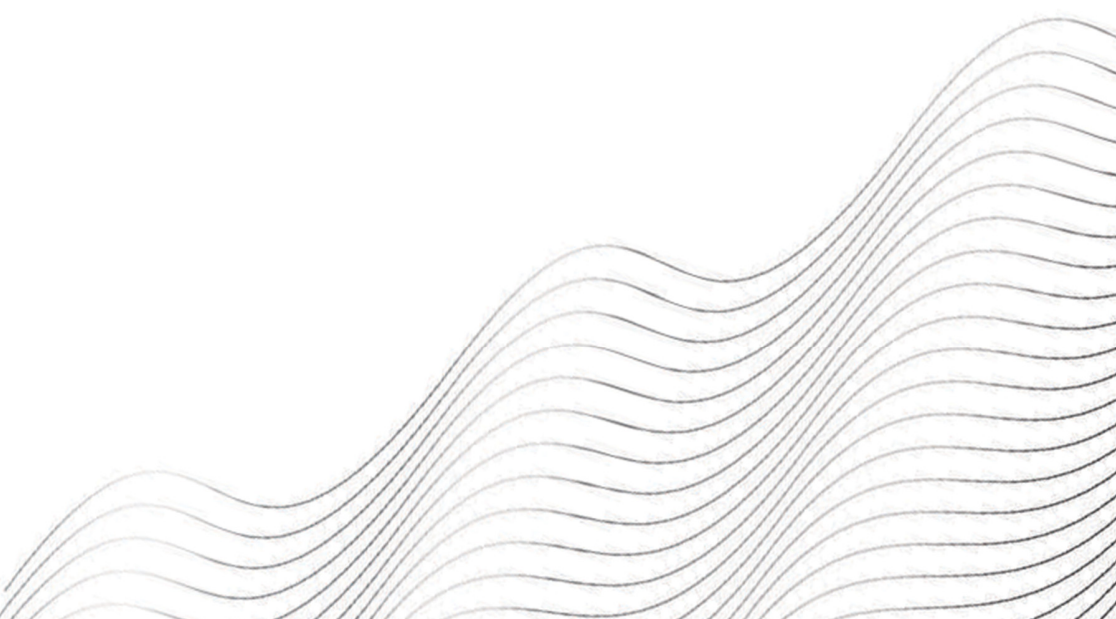

# Consolidated statement of cash flows

For the year ended 30 June 2020

|                                                            | Note | 30 Jun 2020<br>\$'000 | 30 Jun 2019<br>\$'000 |
|------------------------------------------------------------|------|-----------------------|-----------------------|
| <b>CASH FLOWS FROM OPERATING ACTIVITIES</b>                |      |                       |                       |
| Receipts from customers                                    |      | 159,963               | 117,752               |
| Payments to suppliers                                      |      | (60,711)              | (41,382)              |
| Interest received                                          |      | 106                   | 334                   |
| Interest paid                                              |      | (14,582)              | (19,158)              |
| <b>Net cash generated by operating activities</b>          | C10  | <b>84,776</b>         | <b>57,546</b>         |
| <b>CASH FLOWS FROM INVESTING ACTIVITIES</b>                |      |                       |                       |
| Payments for investment properties                         |      | (689,007)             | (578,525)             |
| Proceeds from sale of investment properties                |      | -                     | 56,038                |
| <b>Net cash used in investing activities</b>               |      | <b>(689,007)</b>      | <b>(522,487)</b>      |
| <b>CASH FLOWS FROM FINANCING ACTIVITIES</b>                |      |                       |                       |
| Distribution paid                                          |      | (77,118)              | (53,027)              |
| Proceeds from borrowings                                   |      | 282,525               | 524,951               |
| Repayment of borrowings                                    |      | (32,000)              | (294,000)             |
| Payments for borrowing costs                               |      | (1,789)               | (2,507)               |
| Payments for derivative financial instruments              |      | (5,942)               | -                     |
| Proceeds from issue of units                               |      | 461,299               | 275,845               |
| Equity issue costs                                         |      | (11,481)              | (7,753)               |
| Contribution from manager                                  |      | -                     | 20,000                |
| <b>Net cash generated by financing activities</b>          |      | <b>615,494</b>        | <b>463,509</b>        |
| Net increase/(decrease) in cash and cash equivalents       |      | 11,263                | (1,432)               |
| Cash and cash equivalents at beginning of financial period |      | 17,546                | 18,978                |
| <b>Cash and cash equivalents at end of financial year</b>  | C10  | <b>28,809</b>         | <b>17,546</b>         |

The above consolidated statement of cash flows should be read in conjunction with the accompanying notes.

## 1.7. Consolidate Financial Statement, Centuria Office REIT Annual Report 2021

### Consolidated statement of profit or loss and other comprehensive income

For the year ended 30 June 2021

|                                                                  | Note | 30 Jun 2021<br>\$'000 | 30 Jun 2020<br>\$'000 |
|------------------------------------------------------------------|------|-----------------------|-----------------------|
| <b>REVENUE</b>                                                   |      |                       |                       |
| Rent and recoverable outgoings                                   | B2   | 161,805               | 146,314               |
| <b>Total revenue from continuing operations</b>                  |      | <b>161,805</b>        | <b>146,314</b>        |
| <b>OTHER INCOME</b>                                              |      |                       |                       |
| Gain on fair value of derivative financial instruments           |      | 4,816                 | -                     |
| Other income                                                     |      | 7                     | 106                   |
| <b>Total other income</b>                                        |      | <b>4,823</b>          | <b>106</b>            |
| <b>Total revenue from continuing operations and other income</b> |      | <b>166,628</b>        | <b>146,420</b>        |
| <b>EXPENSES</b>                                                  |      |                       |                       |
| Rates, taxes and other property outgoings                        |      | 41,167                | 35,638                |
| Finance costs                                                    | B3   | 18,418                | 22,719                |
| Loss/(gain) on fair value of investment properties               | C2   | 15,137                | 38,102                |
| Management fees                                                  | D2   | 11,543                | 10,421                |
| Other expenses                                                   |      | 2,251                 | 1,975                 |
| Rental waivers expense                                           |      | 942                   | 1,538                 |
| Expected credit loss expense                                     |      | 234                   | 1,694                 |
| Goodwill Impairment Expense                                      |      | -                     | 6,356                 |
| Loss on fair value of derivative financial instruments           |      | -                     | 4,876                 |
| Transaction costs                                                |      | -                     | 48                    |
| <b>Profit from continuing operations for the year</b>            |      | <b>76,936</b>         | <b>23,053</b>         |
| <b>Net profit for the year</b>                                   |      | <b>76,936</b>         | <b>23,053</b>         |
| <b>OTHER COMPREHENSIVE INCOME</b>                                |      |                       |                       |
| Other comprehensive income for the year                          |      | -                     | -                     |
| <b>Total comprehensive income for the year</b>                   |      | <b>76,936</b>         | <b>23,053</b>         |
| <b>BASIC AND DILUTED EARNINGS PER UNIT</b>                       |      |                       |                       |
| <b>Basic earnings per unit (cents per unit)</b>                  | B4   | <b>15.0</b>           | <b>5.0</b>            |

The above consolidated statement of profit or loss and other comprehensive income should be read in conjunction with the accompanying notes.

# Consolidated statement of financial position

As at 30 June 2021

|                                      | Note | 30 Jun 2021<br>\$'000 | 30 Jun 2020<br>\$'000 |
|--------------------------------------|------|-----------------------|-----------------------|
| <b>ASSETS</b>                        |      |                       |                       |
| <b>Current assets</b>                |      |                       |                       |
| Cash and cash equivalents            | C8   | 15,644                | 28,809                |
| Trade and other receivables          | C1   | 5,369                 | 3,263                 |
| Other assets                         |      | 1,625                 | 1,536                 |
| <b>Total current assets</b>          |      | <b>22,638</b>         | <b>33,608</b>         |
| <b>Non-current assets</b>            |      |                       |                       |
| Investment properties                | C2   | 2,046,221             | 2,085,650             |
| <b>Total non-current assets</b>      |      | <b>2,046,221</b>      | <b>2,085,650</b>      |
| <b>Total assets</b>                  |      | <b>2,068,859</b>      | <b>2,119,258</b>      |
| <b>LIABILITIES</b>                   |      |                       |                       |
| <b>Current liabilities</b>           |      |                       |                       |
| Trade and other payables             | C3   | 31,943                | 22,260                |
| Distributions payable                | B1   | 21,224                | 22,896                |
| <b>Total current liabilities</b>     |      | <b>53,167</b>         | <b>45,156</b>         |
| <b>Non-current liabilities</b>       |      |                       |                       |
| Borrowings                           | C4   | 700,800               | 746,372               |
| Derivative financial instruments     | C5   | 7,240                 | 12,056                |
| Lease liability                      | C2   | 32,660                | 32,722                |
| <b>Total non-current liabilities</b> |      | <b>740,700</b>        | <b>791,150</b>        |
| <b>Total liabilities</b>             |      | <b>793,867</b>        | <b>836,306</b>        |
| <b>Net assets</b>                    |      | <b>1,274,992</b>      | <b>1,282,952</b>      |
| <b>EQUITY</b>                        |      |                       |                       |
| Issued capital                       | C6   | 1,283,138             | 1,283,138             |
| Accumulated losses                   |      | (8,146)               | (186)                 |
| <b>Total equity</b>                  |      | <b>1,274,992</b>      | <b>1,282,952</b>      |

The above consolidated statement of financial position should be read in conjunction with the accompanying notes.

# Consolidated statement of changes in equity

For the year ended 30 June 2021

|                                         | Note | Issued capital<br>\$'000 | Retained earnings/<br>(accumulated losses)<br>\$'000 | Total equity<br>\$'000 |
|-----------------------------------------|------|--------------------------|------------------------------------------------------|------------------------|
| <b>Balance at 1 July 2019</b>           |      | <b>833,320</b>           | <b>61,248</b>                                        | <b>894,568</b>         |
| Net profit for the year                 |      | -                        | 23,053                                               | 23,053                 |
| Total comprehensive income for the year |      | -                        | <b>23,053</b>                                        | <b>23,053</b>          |
| Units issued                            |      | 461,299                  | -                                                    | 461,299                |
| Equity raising costs                    |      | (11,481)                 | -                                                    | (11,481)               |
| Distributions provided for or paid      | B1   | -                        | (84,487)                                             | (84,487)               |
| <b>Balance at 30 June 2020</b>          |      | <b>1,283,138</b>         | <b>(186)</b>                                         | <b>1,282,952</b>       |
| <b>Balance at 1 July 2020</b>           |      | <b>1,283,138</b>         | <b>(186)</b>                                         | <b>1,282,952</b>       |
| Net profit for the year                 |      | -                        | 76,936                                               | 76,936                 |
| Total comprehensive income for the year |      | -                        | <b>76,936</b>                                        | <b>76,936</b>          |
| Distributions provided for or paid      | B1   | -                        | (84,896)                                             | (84,896)               |
| <b>Balance at 30 June 2021</b>          |      | <b>1,283,138</b>         | <b>(8,146)</b>                                       | <b>1,274,992</b>       |

The above consolidated statement of changes in equity should be read in conjunction with the accompanying notes.

# Consolidated statement of cash flows

For the year ended 30 June 2021

|                                                             | Note      | 30 Jun 2021<br>\$'000 | 30 Jun 2020<br>\$'000 |
|-------------------------------------------------------------|-----------|-----------------------|-----------------------|
| <b>CASH FLOWS FROM OPERATING ACTIVITIES</b>                 |           |                       |                       |
| Receipts from customers                                     |           | 185,778               | 159,963               |
| Payments to suppliers                                       |           | (63,000)              | (60,711)              |
| Interest received                                           |           | 7                     | 106                   |
| Interest paid                                               |           | (17,250)              | (14,582)              |
| <b>Net cash generated by operating activities</b>           | <b>C8</b> | <b>105,535</b>        | <b>84,776</b>         |
| <b>CASH FLOWS FROM INVESTING ACTIVITIES</b>                 |           |                       |                       |
| Payments for investment properties                          |           | (30,379)              | (689,007)             |
| Proceeds from sale of investment properties                 |           | 44,516                | -                     |
| <b>Net cash generated by/(used in) investing activities</b> |           | <b>14,137</b>         | <b>(689,007)</b>      |
| <b>CASH FLOWS FROM FINANCING ACTIVITIES</b>                 |           |                       |                       |
| Distribution paid                                           |           | (86,568)              | (77,118)              |
| Proceeds from borrowings                                    |           | 177,500               | 282,525               |
| Repayment of borrowings                                     |           | (222,200)             | (32,000)              |
| Payments for borrowing costs                                |           | (1,569)               | (1,789)               |
| Payments for derivative financial instruments               |           | -                     | (5,942)               |
| Proceeds from issue of units                                |           | -                     | 461,299               |
| Equity issue costs                                          |           | -                     | (11,481)              |
| <b>Net cash (used in)/generated by financing activities</b> |           | <b>(132,837)</b>      | <b>615,494</b>        |
| Net (decrease)/increase in cash and cash equivalents        |           | (13,165)              | 11,263                |
| Cash and cash equivalents at beginning of financial period  |           | 28,809                | 17,546                |
| <b>Cash and cash equivalents at end of financial year</b>   | <b>C8</b> | <b>15,644</b>         | <b>28,809</b>         |

The above consolidated statement of cash flows should be read in conjunction with the accompanying notes.



## Supplementary-2 PROPERTY OVERVIEW

### 2.1 Centuria Office REIT Property Overview 2015

#### Centuria Metropolitan REIT Notes to the financial statements

For the year ended 30 June 2015

|                                                                                | 30 Jun 2015<br>\$ | 30 Jun 2014<br>\$ |
|--------------------------------------------------------------------------------|-------------------|-------------------|
| 7. Investment properties                                                       |                   |                   |
| Opening balance                                                                | 110,450,000       | 107,150,000       |
| Purchase price of investment properties                                        | 200,950,000       | -                 |
| Stamp duty and other transaction costs                                         | 9,996,046         | -                 |
| Capital improvements                                                           | 1,838,688         | 1,108,096         |
| Total purchase costs                                                           | 212,784,734       | 1,108,096         |
| Gain on fair value before write-down of stamp duty and other transaction costs | 9,544,744         | 2,689,417         |
| Write-down of stamp duty and other transaction costs                           | (9,996,046)       | -                 |
| (Loss)/gain on fair value                                                      | (451,302)         | 2,689,417         |
| Change in deferred rent and lease incentives                                   | 161,607           | (497,513)         |
| Change in capitalised leasing fees                                             | 164,961           | -                 |
| Closing balance <sup>^</sup>                                                   | 323,110,000       | 110,450,000       |

<sup>^</sup> The carrying amount of investment properties includes components related to deferred rent, capitalised lease incentives and leasing fees amounting to \$4,304,718 (2014: \$3,978,150).

| Property                           | 30 Jun 2015<br>Valuer | 30 Jun 2015<br>Capitalisation<br>Rate | 30 Jun 2015<br>Fair Value<br>\$ | Last<br>Independent<br>Valuation Date | Independent Valuer<br>Capitalisation Rate | Independent Valuer<br>Firm |
|------------------------------------|-----------------------|---------------------------------------|---------------------------------|---------------------------------------|-------------------------------------------|----------------------------|
| 3 Carlingford Rd, Epping NSW       | Director              | 7.50%                                 | 21,000,000                      | Mar 2015                              | 7.50%                                     | CBRE                       |
| 44 Hampden Rd, Artarmon NSW        | Director              | 8.75%                                 | 7,600,000                       | Dec 2014                              | 9.00%                                     | DTZ                        |
| 1 Richmond Rd, Keswick SA          | Director              | 9.50%                                 | 25,150,000                      | Sep 2014                              | 10.00%                                    | JLL                        |
| 9 Help St, Chatswood NSW           | Independent           | 8.25%                                 | 48,500,000                      | Jun 2015                              | 8.25%                                     | DTZ                        |
| 14 Mars Rd, Lane Cove NSW          | Director              | 9.25%                                 | 18,500,000                      | Sep 2014                              | 9.25%                                     | Colliers                   |
| 555 Coronation Dr, Brisbane QLD    | Director              | 8.50%                                 | 33,800,000                      | Dec 2014                              | 8.75%                                     | DTZ                        |
| 149 Kerry Rd, Archerfield QLD      | Director              | 7.75%                                 | 22,700,000                      | Dec 2014                              | 8.00%                                     | DTZ                        |
| 13 Fendell St, Granville NSW       | Director              | 8.25%                                 | 16,600,000                      | Sep 2014                              | 8.25%                                     | DTZ                        |
| 35 Robina Town Ctr Dr, Robina QLD* | Director              | 7.75%                                 | 46,000,000                      | Mar 2015                              | 7.75%                                     | CBRE                       |
| 54 Marcus Clarke St, Canberra ACT* | Director              | 10.00%                                | 14,200,000                      | Mar 2015                              | 10.00%                                    | Savills                    |
| 60 Marcus Clarke St, Canberra ACT* | Director              | 8.35%                                 | 49,060,000                      | Mar 2015                              | 8.35%                                     | Savills                    |
| 131-139 Grenfell St, Adelaide SA*  | Director              | 9.00%                                 | 20,000,000                      | Mar 2015                              | 9.00%                                     | Savills                    |
|                                    |                       |                                       | 323,110,000                     |                                       |                                           |                            |

\* Directors' valuations adopted at 30 June 2015 are consistent with the last independent valuations performed.



## Centuria Metropolitan REIT

### Notes to the financial statements

For the year ended 30 June 2015

#### 7. Investment properties (continued)

During the year, the Fund acquired the following investment properties at the below contracted purchase price (excluding stamp duty and other transaction costs):

| Property                          | Purchase Price<br>\$ | Month Acquired |
|-----------------------------------|----------------------|----------------|
| 555 Coronation Dr, Brisbane QLD   | 33,400,000           | Dec 2014       |
| 149 Kerry Rd, Archerfield QLD     | 22,172,000           | Dec 2014       |
| 13 Ferndell St, Granville NSW     | 16,118,000           | Dec 2014       |
| 35 Robina Town Ctr Dr, Robina QLD | 46,000,000           | May 2015       |
| 54 Marcus Clarke St, Canberra ACT | 14,200,000           | Jun 2015       |
| 60 Marcus Clarke St, Canberra ACT | 49,060,000           | Jun 2015       |
| 131-139 Grenfell St, Adelaide SA  | 20,000,000           | Jun 2015       |
|                                   | <u>200,950,000</u>   |                |

#### Leases as lessor

The Fund leases out its investment properties under operating leases. The future minimum lease payments receivable under non-cancellable leases are as follows:

|                            | 30 Jun 2015<br>\$  | 30 Jun 2014<br>\$ |
|----------------------------|--------------------|-------------------|
| Less than one year         | 31,414,123         | 12,124,747        |
| Between one and five years | 88,004,853         | 29,744,620        |
| More than five years       | 29,707,273         | 9,839,272         |
|                            | <u>149,126,249</u> | <u>51,708,639</u> |

#### Fair value measurement

The fair value measurement of investment property has been categorised as a Level 3 fair value based on the inputs to the valuation techniques (refer to Note 18A).

#### Reconciliation of Level 3 fair value measurement

|                                                                        |                           |
|------------------------------------------------------------------------|---------------------------|
| Balance at 1 July 2014                                                 | 110,450,000               |
| Total purchase costs                                                   | 212,784,734               |
| Change in deferred rent, lease incentives and capitalised leasing fees | 326,568                   |
| Total gains/(losses) recognised in profit or loss                      | (451,302)                 |
| <b>Balance at 30 June 2015</b>                                         | <u><b>323,110,000</b></u> |

#### Valuation techniques and significant unobservable inputs

The fair value of the investment properties were determined by the directors of the Responsible Entity or by an external, independent valuation company having an appropriate recognised professional qualification and recent experience in the location and category of the properties being valued. Fair value is based on market values, being the estimated amount for which a property could be exchanged on the date of valuation between a willing buyer and willing seller in an arm's length transaction after proper marketing wherein the parties had each acted knowledgeably, prudently and without compulsion.

## Centuria Metropolitan REIT Notes to the financial statements

For the year ended 30 June 2015

### 7. Investment properties (continued)

#### **Valuation techniques and significant unobservable inputs (continued)**

The valuations were prepared by considering the following valuation methodologies:

- **Capitalisation Approach:** the annual net rental income is capitalised at an appropriate market yield to arrive at the property's market value. Appropriate capital adjustments are then made where necessary to reflect the specific cash flow profile and the general characteristics of the property.
- **Discounted Cash Flow Approach:** this approach incorporates the estimation of future annual cash flows over a 10 year period by reference to expected rental growth rates, ongoing capital expenditure, terminal sale value and acquisition and disposal costs. The present value of future cash flows is then determined by the application of an appropriate discount rate to derive a net present value for the property.
- **Direct Comparison Approach:** this approach identifies comparable sales on a dollar per square metre of lettable area basis and compares the equivalent rates to the property being valued to determine the property's market value.

The valuations reflect, when appropriate; the type of tenants actually in occupation or responsible for meeting lease commitments or likely to be in occupation after letting of vacant accommodation and the market's general perception of their credit-worthiness; the allocation of maintenance and insurance responsibilities between the lessor and lessee; and the remaining economic life of the property. It has been assumed that whenever rent reviews or lease renewals are pending with anticipated reversionary increases, all notices and, where appropriate, counter notices have been served validly and within the appropriate time.

The following table outlines the significant unobservable inputs used in the above valuation techniques and their relationship with the fair value measurement:

| Significant unobservable inputs | Relevant valuation method(s)          | Range of inputs | Relationship with fair value                                    |
|---------------------------------|---------------------------------------|-----------------|-----------------------------------------------------------------|
| Discount rate                   | Capitalisation                        | 8.00% to 11.50% | The higher/lower the rate, the lower/higher the fair value.     |
| Terminal yield                  | Discounted Cash Flow                  | 8.00% to 10.50% | The higher/lower the rate, the lower/higher the fair value.     |
| Capitalisation rate             | Capitalisation                        | 7.50% to 10.00% | The higher/lower the rate, the lower/higher the fair value.     |
| Vacancy period                  | Capitalisation & Discounted Cash Flow | 9 to 18 months  | The longer/shorter the period, the lower/higher the fair value. |
| Rental growth rate              | Capitalisation & Discounted Cash Flow | 1.00% to 6.00%  | The higher/lower the rate, the higher/lower the fair value.     |
| Rent per square metre           | Direct Comparison                     | \$91 to \$576   | The higher/lower the amount, the higher/lower the fair value.   |

## 2.2 Centuria Office REIT Property Overview 2016

### Portfolio Overview

#### Portfolio positioned to ensure income and value continue to grow

| Portfolio snapshot     |         | FY16  | FY15  |   |
|------------------------|---------|-------|-------|---|
| Number of assets       | (#)     | 13    | 12    | ▲ |
| Book value             | (\$m)   | 398.7 | 323.1 | ▲ |
| WACR                   | (%)     | 7.86  | 8.43  | ▼ |
| FY16 NOI <sup>1</sup>  | (\$m)   | 28.1  | 10.3  | ▲ |
| Occupancy <sup>2</sup> | (%)     | 97.2  | 96.7  | ▲ |
| FY17 expiries          | (%)     | 8.7   | 13.6  | ▼ |
| WALE <sup>2</sup>      | (years) | 4.4   | 4.8   | ▼ |

#### Geographic diversification (by value)

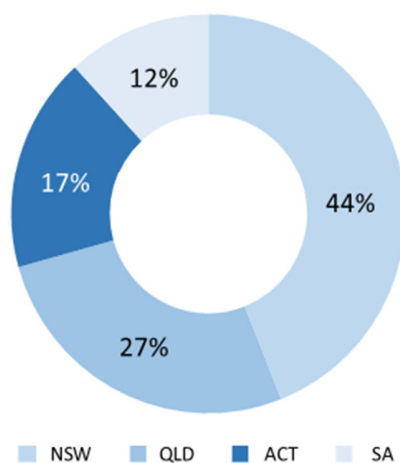

1. Represents 6.3 months of income since listing  
 2. Includes 2 transactions under HOA subject to lease finalisation and execution

#### Weighted Average Lease Expiry<sup>2,3</sup>

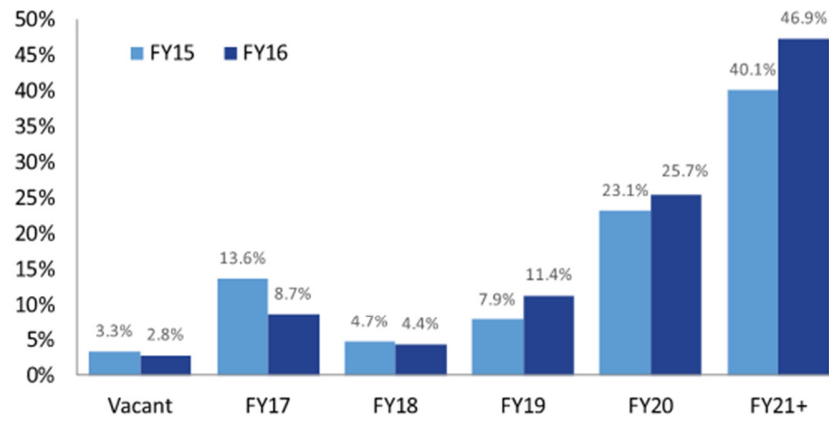

#### Tenancy Diversification (top 10 tenants by gross income)

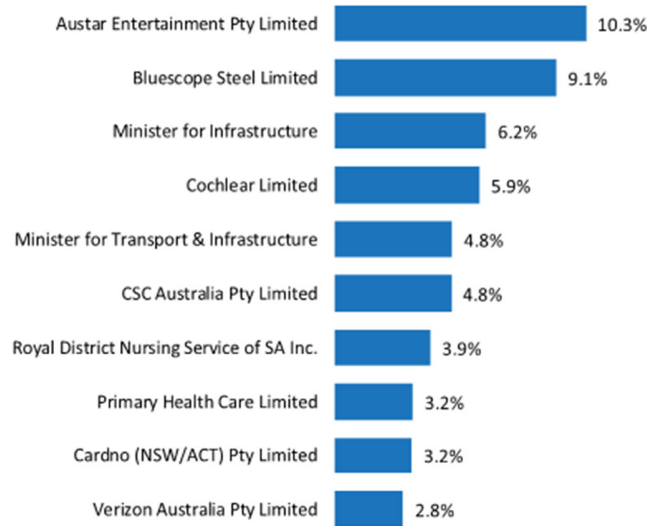

2. Includes 2 transactions under HOA subject to lease finalisation and execution  
 3. By NLA

## 2.3 Centuria Office REIT Property Overview 2017

### Portfolio overview <sup>1</sup>

Portfolio positioned to ensure income and value continue to grow

#### Geographic diversification (by value)

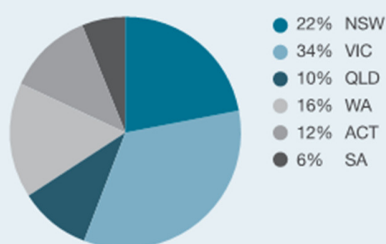

#### Tenant composition (by income)

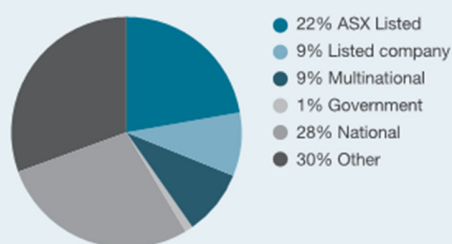

#### Weighted average lease expiry (WALE)

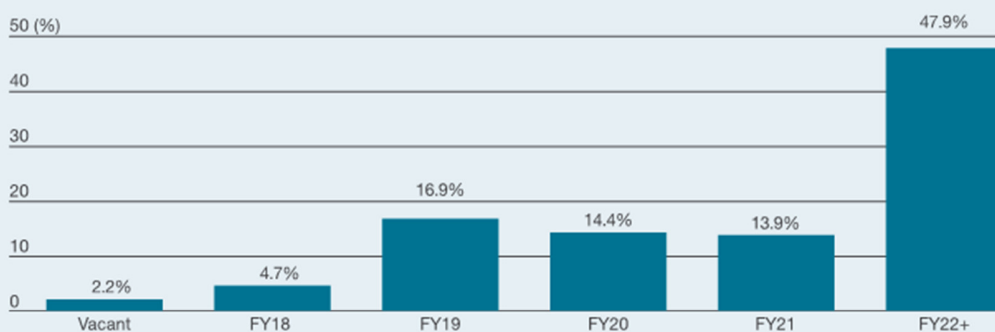

#### Top 10 tenants (by gross income)

|                                          |      |
|------------------------------------------|------|
| Insurance Australia Limited              | 8.4% |
| Target Australia <sup>2</sup>            | 6.3% |
| Austar Entertainment Pty Limited         | 6.0% |
| Bluescope Steel Limited                  | 5.0% |
| Hatch                                    | 4.1% |
| Minister for Works (WA Police)           | 4.0% |
| GE Capital Finance Australasia           | 3.7% |
| Domino's Pizza Ltd                       | 3.5% |
| Minister for Infrastructure              | 3.4% |
| Department Housing & Public Works (QCAA) | 3.4% |

1. All portfolio metrics on this page include post 30 June 2017 acquisitions and Williams Landing, VIC, as if complete.  
 2. Upon completion, expected Q1 CY19.

## Portfolio profile

### NSW

9 Help Street, Chatswood  
 203 Pacific Highway, St Leonards  
 44 Hampden Road, Artarmon  
 3 Carlingford Road, Epping  
 13 Fernfell Street, Granville

### ACT

54 Marcus Clarke Street, Canberra  
 60 Marcus Clarke Street, Canberra

### QLD

35 Robina Town Centre Drive, Robina  
 555 Coronation Drive, Brisbane  
 438-517 Kingsford Smith Drive, Hamilton  
 154 Melbourne Street, South Brisbane  
 149 Kerry Road, Archerfield

### VIC

576 Swan Street, Richmond  
 2 Kendall St, Williams Landing

### WA

144 Stirling St, Perth  
 42-46 Collins Street, West Perth

### SA

1 Richmond Road, Keswick  
 131-139 Grenfell Street, Adelaide

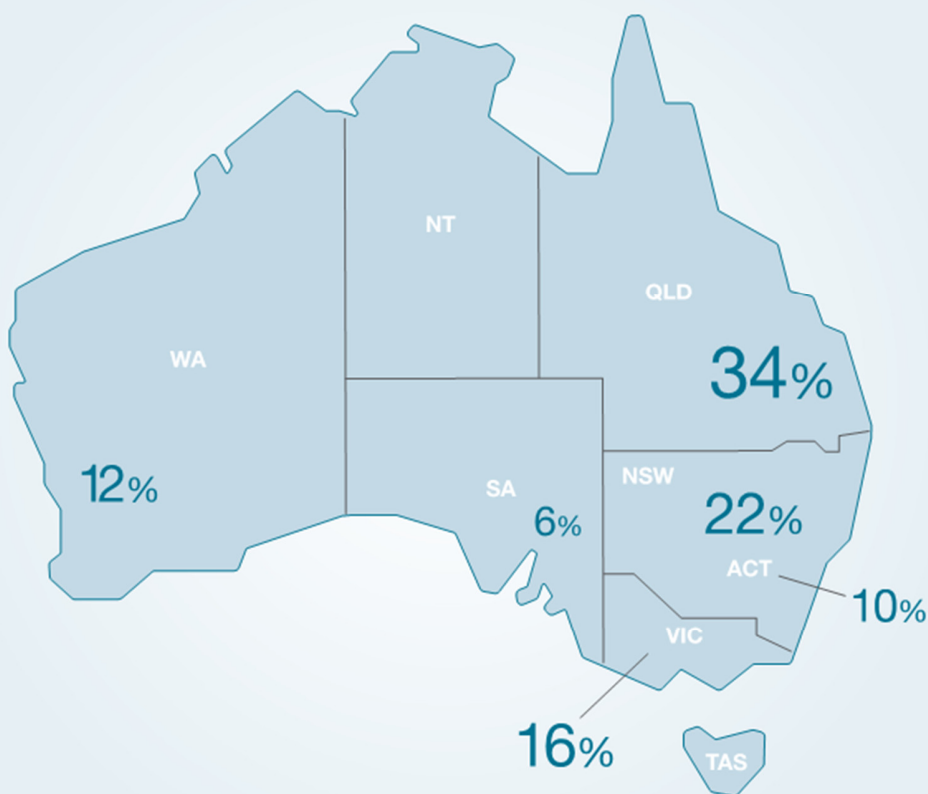

## ASSETS AND LIABILITIES

### 7. TRADE AND OTHER RECEIVABLES

|                           | 30 Jun 2017<br>\$'000 | 30 Jun 2016<br>\$'000 |
|---------------------------|-----------------------|-----------------------|
| <i>Current</i>            |                       |                       |
| Trade debtors             | 259                   | 72                    |
| Distributions receivable  | –                     | 173                   |
| Other current receivables | 868                   | 132                   |
|                           | 1,127                 | 377                   |

Refer to Note 20 for details on fair value measurement and the Trust's exposure to risks associated with financial assets (other receivables are not considered to be financial assets).

Trade receivables and other receivables are initially recognised at fair value and subsequently at amortised cost using the effective interest rate method, less an allowance for impairment. Due to the short-term nature of these financial rights, their carrying amounts are estimated to represent their fair values.

The carrying amounts of the Trust's assets, other than those recorded at fair value, are reviewed at each reporting date to determine whether there is any indication of impairment. If any such indication exists, the asset's recoverable amount is estimated. An impairment loss is recognised whenever the carrying amount of an asset exceeds its recoverable amount. Impairment losses are recognised directly in profit or loss.

### 8. INVESTMENT PROPERTIES

|                                                                                | 30 Jun 2017<br>\$'000 | 30 Jun 2016<br>\$'000 |
|--------------------------------------------------------------------------------|-----------------------|-----------------------|
| Opening balance                                                                | 398,730               | 323,110               |
| Properties acquired on CUA acquisition                                         | 213,000               | –                     |
| Purchase price of investment properties                                        | –                     | 43,025                |
| Stamp duty and other transaction costs                                         | –                     | 2,491                 |
| Capital improvements                                                           | 5,119                 | 2,998                 |
| Total purchase costs                                                           | 5,119                 | 48,514                |
| Gain on fair value before write-down of stamp duty and other transaction costs | 17,180                | 25,737                |
| Write-down of stamp duty and other transaction costs                           | –                     | (2,491)               |
| Gain on fair value of investment properties                                    | 17,180                | 23,246                |
| Change in deferred rent and lease incentives                                   | 428                   | 3,263                 |
| Disposed deferred rent and lease incentives                                    | 938                   | –                     |
| Change in capitalised leasing fees                                             | 545                   | 597                   |
| Disposals at fair value                                                        | (26,000)              | –                     |
| Disposal costs                                                                 | 10                    | –                     |
| Closing balance <sup>^</sup>                                                   | 609,950               | 398,730               |

<sup>^</sup> The carrying amount of investment properties includes components related to deferred rent, capitalised lease incentives and leasing fees amounting to \$9,138,000 (2016: \$8,165,000).

During the year, the Trust acquired 438-517 Kingsford Smith Drive, QLD, 154 Melbourne Street, QLD, and 567 Swan Street, VIC as part of the acquisition of CUA. In addition, the Trust disposed of 14 Mars Road, Lane Cove NSW for a gross sale price of \$26,000,000.

## Notes to the consolidated financial statements

For the year ended 30 June 2017

### ASSETS AND LIABILITIES

#### 8. INVESTMENT PROPERTIES CONTINUED

##### Leases as lessor

The Trust leases out its investment properties under operating leases. The future minimum lease payments receivable under non-cancellable leases are as follows:

|                            | 30 Jun 2017<br>\$'000 | 30 Jun 2016<br>\$'000 |
|----------------------------|-----------------------|-----------------------|
| Less than one year         | 41,710                | 32,117                |
| Between one and five years | 104,726               | 88,856                |
| More than five years       | 27,062                | 20,431                |
|                            | 173,498               | 141,404               |

| Property                                      | 30 Jun 2017<br>Fair Value<br>\$'000 | 30 Jun 2016<br>Fair Value<br>\$'000 | 30 Jun 2017<br>Capitalisation<br>Rate | 30 Jun 2016<br>Capitalisation<br>Rate | 30 Jun 2017<br>Discount<br>Rate | 30 Jun 2016<br>Discount<br>Rate | 30 Jun 2017<br>Valuer | Last<br>Independent<br>Valuation<br>Date |
|-----------------------------------------------|-------------------------------------|-------------------------------------|---------------------------------------|---------------------------------------|---------------------------------|---------------------------------|-----------------------|------------------------------------------|
| 3 Carlingford Rd, Epping NSW                  | 27,000                              | 27,000                              | 6.25%                                 | 6.25%                                 | 7.00%                           | 7.50%                           | Independent           | Jun 2017                                 |
| 44 Hampden Rd, Artarmon NSW <sup>*</sup>      | 9,000                               | 8,500                               | 8.00%                                 | 8.50%                                 | 8.75%                           | 9.00%                           | Director              | May 2016                                 |
| 1 Richmond Rd, Keswick SA                     | 28,500                              | 26,700                              | 8.50%                                 | 9.25%                                 | 8.75%                           | 9.75%                           | Director              | May 2016                                 |
| 9 Help St, Chatswood NSW                      | 65,000                              | 55,100                              | 6.50%                                 | 7.25%                                 | 7.50%                           | 8.50%                           | Independent           | Jun 2017                                 |
| 14 Mars Rd, Lane Cove NSW                     | –                                   | 21,500                              | –                                     | 8.00%                                 | –                               | 8.00%                           | N/A                   | May 2016                                 |
| 555 Coronation Dr, Brisbane QLD               | 31,500                              | 33,100                              | 8.00%                                 | 8.25%                                 | 8.75%                           | 8.75%                           | Director              | May 2016                                 |
| 149 Kerry Rd, Archerfield QLD                 | 25,500                              | 24,500                              | 7.25%                                 | 7.50%                                 | 8.25%                           | 8.50%                           | Director              | May 2016                                 |
| 13 Ferndell St, Granville NSW                 | 18,200                              | 17,800                              | 7.50%                                 | 7.75%                                 | 8.75%                           | 9.25%                           | Director              | May 2016                                 |
| 35 Robina Town Ctr Dr, Robina QLD             | 51,000                              | 48,800                              | 7.25%                                 | 7.50%                                 | 8.25%                           | 8.50%                           | Director              | May 2016                                 |
| 54 Marcus Clarke St, Canberra ACT             | 18,250                              | 16,930                              | 8.75%                                 | 9.25%                                 | 9.00%                           | 9.00%                           | Director              | May 2016                                 |
| 60 Marcus Clarke St, Canberra ACT             | 56,000                              | 52,800                              | 7.75%                                 | 8.25%                                 | 8.00%                           | 8.25%                           | Director              | May 2016                                 |
| 131-139 Grenfell St, Adelaide SA              | 19,500                              | 20,500                              | 8.50%                                 | 8.75%                                 | 8.75%                           | 9.00%                           | Director              | May 2016                                 |
| 203 Pacific Hwy, St Leonards NSW <sup>^</sup> | 47,500                              | 45,500                              | 7.00%                                 | 7.50%                                 | 7.50%                           | 8.00%                           | Independent           | Jun 2017                                 |
| 438-517 Kingsford Smith Dr, Hamilton QLD      | 74,500                              | –                                   | 7.00%                                 | –                                     | 8.00%                           | –                               | Director              | Apr 2016                                 |
| 154 Melbourne St, South Brisbane QLD          | 77,500                              | –                                   | 7.00%                                 | –                                     | 7.75%                           | –                               | Director              | Mar 2015                                 |
| 567 Swan St, Richmond VIC                     | 61,000                              | –                                   | 6.25%                                 | –                                     | 7.25%                           | –                               | Director              | May 2016                                 |
|                                               | 609,950                             | 398,730                             |                                       |                                       |                                 |                                 |                       |                                          |

<sup>\*</sup> The Trust owns 50% of 203 Pacific Highway, St Leonards NSW.

<sup>^</sup> The Trust holds a leasehold interest in 44 Hampden Road, Artarmon NSW and 203 Pacific Highway, St Leonards NSW.

During the year, the Trust acquired 438-517 Kingsford Smith Drive, QLD, 154 Melbourne Street, QLD, and 567 Swan Street, VIC as part of the acquisition of CUA. In addition, the Trust disposed of 14 Mars Road, Lane Cove NSW for a gross sale price of \$26,000,000.

The Trust's weighted average capitalisation rate for the year is 7.19% (2016: 7.86%).



## 2.4 Centuria Office REIT Property Overview 2018

### Overview

#### Key portfolio metrics<sup>1</sup>

| Metric              | Total    |
|---------------------|----------|
| Assets              | 19       |
| Book Value          | \$930.5m |
| Capitalisation rate | 6.68%    |
| Net Lettable Area   | 183,339  |
| Occupancy (by NLA)  | 98.9%    |
| WALE (by Income)    | 4.0      |

#### Top 10 tenants (by gross income)<sup>1</sup>

| Rank | Tenant                           | % Total Income |
|------|----------------------------------|----------------|
| 1    | Insurance Australia Limited      | 6.5%           |
| 2    | Target Australia                 | 5.8%           |
| 3    | Austar Entertainment Pty Limited | 5.5%           |
| 4    | Bluescope Steel Limited          | 4.6%           |
| 5    | Hatch                            | 3.8%           |
| 6    | Minister for Works (WA Police)   | 3.7%           |
| 7    | GE Capital Finance Australasia   | 3.4%           |
| 8    | Domino's Pizza Ltd               | 3.2%           |
| 9    | Cisco Systems Australia          | 3.2%           |
| 10   | Minister for Infrastructure      | 3.2%           |

#### Portfolio overview<sup>1</sup>

| Property                                        | State | Book Value (\$m) | Indep. Valuation (\$m) | Cap Rate     | NLA (sqm)      | \$ (sqm)     | WALE <sup>2</sup> (years) | Occupancy <sup>3</sup> |
|-------------------------------------------------|-------|------------------|------------------------|--------------|----------------|--------------|---------------------------|------------------------|
| <b>Office</b>                                   |       |                  |                        |              |                |              |                           |                        |
| 201 Pacific Highway, St Leonards <sup>4</sup>   | NSW   | \$85.0m          | \$85.8m                | 6.50%        | 16,488         | 10,310       | 2.9                       | 99.8%                  |
| 9 Help Street, Chatswood                        | NSW   | \$76.0m          | \$76.0m                | 6.00%        | 9,394          | 8,090        | 3.0                       | 100.0%                 |
| 203 Pacific Highway, St Leonards <sup>4</sup>   | NSW   | \$57.0m          | \$57.0m                | 6.50%        | 11,734         | 9,715        | 5.4                       | 100.0%                 |
| 3 Carlingford Road, Epping                      | NSW   | \$36.0m          | \$28.3m                | 5.25%        | 4,702          | 7,657        | 2.0                       | 100.0%                 |
| 77 Market Street, Wollongong                    | NSW   | \$34.6m          | \$33.3m                | 7.00%        | 6,755          | 5,123        | 4.4                       | 100.0%                 |
| 576 Swan Street, Richmond                       | VIC   | \$63.5m          | \$62.0m                | 5.75%        | 8,331          | 7,622        | 3.7                       | 100.0%                 |
| 2 Kendall Street, Williams Landing <sup>1</sup> | VIC   | \$58.2m          | \$58.2m                | 6.50%        | 12,919         | 4,507        | 10.0                      | 100.0%                 |
| 154 Melbourne Street, South Brisbane            | QLD   | \$78.5m          | \$76.0m                | 6.75%        | 11,314         | 6,939        | 2.2                       | 88.4%                  |
| 438-517 Kingsford Smith Drive, Hamilton         | QLD   | \$78.0m          | \$77.0m                | 6.25%        | 9,322          | 8,367        | 6.5                       | 99.2%                  |
| 35 Robina Town Centre Drive, Robina             | QLD   | \$55.3m          | \$55.0m                | 7.13%        | 9,814          | 5,630        | 5.3                       | 100.0%                 |
| 555 Coronation Drive, Toowong                   | QLD   | \$32.5m          | \$33.7m                | 7.50%        | 5,569          | 5,836        | 2.5                       | 90.1%                  |
| 60 Marcus Clarke, Canberra                      | ACT   | \$63.5m          | \$61.5m                | 7.00%        | 12,132         | 5,234        | 2.4                       | 100.0%                 |
| 54 Marcus Clarke, Canberra                      | ACT   | \$20.9m          | \$20.9m                | 7.50%        | 5,169          | 4,043        | 3.9                       | 100.0%                 |
| 144 Stirling Street, Perth                      | WA    | \$56.0m          | \$55.3m                | 7.50%        | 11,042         | 5,072        | 2.9                       | 100.0%                 |
| 42-46 Colin Street, West Perth                  | WA    | \$34.5m          | \$33.6m                | 7.50%        | 8,439          | 4,088        | 4.6                       | 100.0%                 |
| 1 Richmond Road, Keswick                        | SA    | \$33.0m          | \$33.0m                | 7.50%        | 8,087          | 4,081        | 5.0                       | 100.0%                 |
| 131-139 Grenfell Street, Adelaide <sup>6</sup>  | SA    | \$19.3m          | \$19.3m                | 8.00%        | 4,052          | 4,751        | 1.4                       | 100.0%                 |
| <b>Industrial</b>                               |       |                  |                        |              |                |              |                           |                        |
| 149 Kerry Road, Archerfield                     | QLD   | \$28.1m          | \$27.3m                | 6.25%        | 13,774         | 2,040        | 6.5                       | 100.0%                 |
| 13 Ferndell Street, Granville                   | NSW   | \$20.7m          | \$19.9m                | 6.75%        | 15,302         | 1,353        | 1.8                       | 100.0%                 |
| <b>Total / weighted average</b>                 |       | <b>\$930.5m</b>  | <b>\$913.0m</b>        | <b>6.68%</b> | <b>184,339</b> | <b>5,818</b> | <b>4.0</b>                | <b>98.9%</b>           |

1) Excluding WACR, includes 2 Kendall Street, Williams Landing, VIC as if complete

2) Weighted by gross income

3) By area

4) 50% interest

5) Contracted to sell, settlement expected to occur November 2018.

6) Levels 5-9

## Portfolio diversification (by value)

Geographic diversification<sup>1</sup>

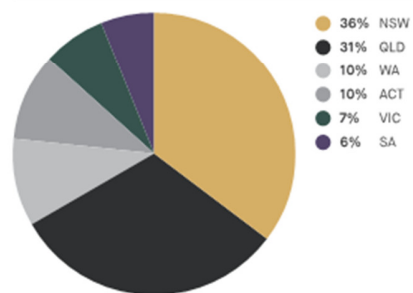

Tenant composition (by income)<sup>1</sup>

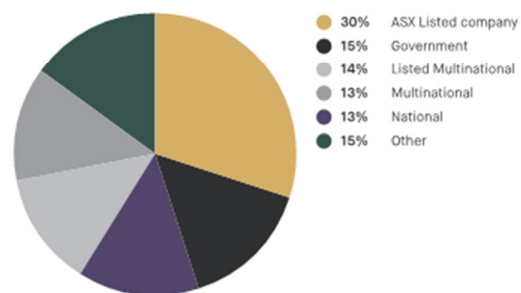

Tenant industry sector diversifications<sup>1</sup>

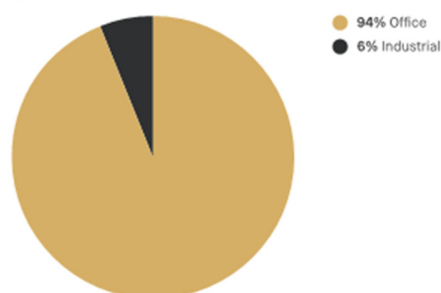

Tenancy profile by size cohort (by no. tenants)<sup>1</sup>

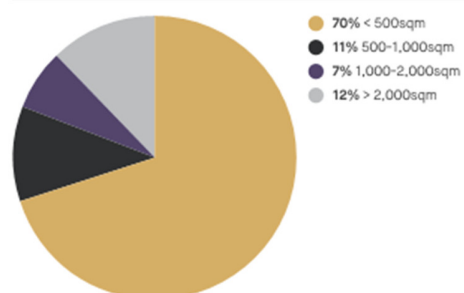

Weighted average lease expiry (by income)

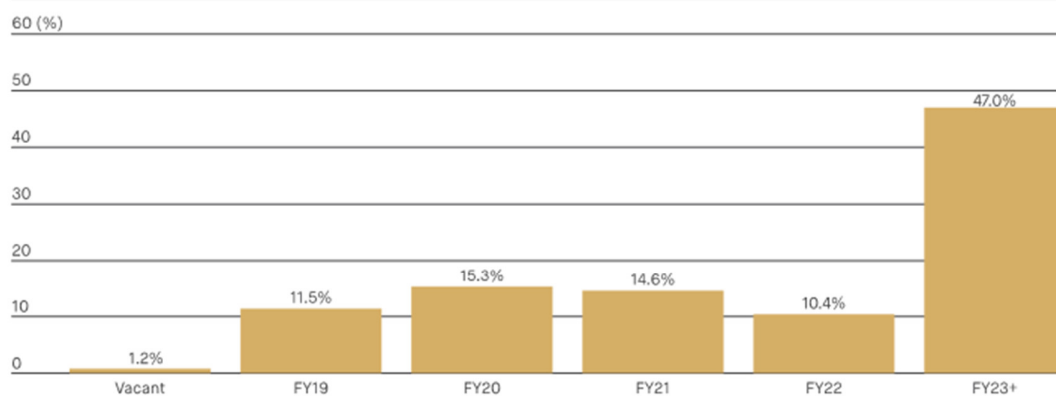

<sup>1</sup>) Includes acquisitions and includes Williams Landing, VIC, as if complete

## 2.5 Centuria Office REIT Property Overview 2019

### Overview

#### Key portfolio metrics<sup>1</sup>

| Metric                  | Total   |
|-------------------------|---------|
| Assets (qty)            | 20      |
| Book Value (\$m)        | 1,400   |
| Capitalisation rate (%) | 6.22%   |
| Net Lettable Area (sqm) | 218,080 |
| Occupancy (by Income)   | 98.4%   |
| WALE (by Income)        | 3.9     |

#### Top 10 tenants (by gross income)<sup>1</sup>

| Rank | Tenant                   | % Total Income |
|------|--------------------------|----------------|
| 1    | Infosys Technologies     | 6.0%           |
| 2    | Laing O'Rourke           | 5.1%           |
| 3    | Insurance Australia      | 4.1%           |
| 4    | Target Australia         | 4.1%           |
| 5    | Foxtel                   | 4.0%           |
| 6    | Ericsson Australia       | 3.9%           |
| 7    | QLD Government           | 3.7%           |
| 8    | Ergon Energy Corporation | 2.9%           |
| 9    | Hatch                    | 2.8%           |
| 10   | WA Government            | 2.7%           |

#### Portfolio Overview<sup>1</sup>

| Property                                       | State | Book Value (\$m)  | Indep. Valuation (\$m) | Cap Rate     | NLA (sqm)      | \$ (sqm)     | WALE <sup>1</sup> (years) | Occupancy <sup>2</sup> |
|------------------------------------------------|-------|-------------------|------------------------|--------------|----------------|--------------|---------------------------|------------------------|
| 201 Pacific Highway, St Leonards <sup>3</sup>  | NSW   | \$101.5m          | \$101.5m               | 5.75%        | 16,489         | 6,156        | 4.0                       | 99.5%                  |
| 9 Help Street, Chatswood                       | NSW   | \$84.0m           | \$84.0m                | 5.75%        | 9,395          | 8,941        | 2.6                       | 100.0%                 |
| 203 Pacific Highway, St Leonards <sup>3</sup>  | NSW   | \$65.8m           | \$65.8m                | 5.88%        | 11,734         | 5,603        | 4.3                       | 99.6%                  |
| 465 Victoria Avenue, Chatswood <sup>4</sup>    | NSW   | \$41.6m           | \$41.1m                | 5.75%        | 15,664         | 2,657        | 4.4                       | 100.0%                 |
| 77 Market St, Wollongong                       | NSW   | \$36.2m           | \$36.0m                | 7.25%        | 6,755          | 5,359        | 6.0                       | 100.0%                 |
| 818 Bourke Street, Docklands                   | VIC   | \$224.0m          | \$222.6m               | 5.25%        | 23,271         | 9,626        | 3.2                       | 100.0%                 |
| 576 Swan Street, Richmond                      | VIC   | \$68.0m           | \$62.0m                | 5.50%        | 8,331          | 8,162        | 2.7                       | 100.0%                 |
| 2 Kendall Street, Williams Landing             | VIC   | \$64.3m           | \$64.2m                | 5.88%        | 12,961         | 4,961        | 9.4                       | 100.0%                 |
| 825 Ann Street, Fortitude Valley               | QLD   | \$164.0m          | \$163.0m               | 6.25%        | 19,155         | 8,562        | 4.2                       | 100.0%                 |
| 154 Melbourne Street, South Brisbane           | QLD   | \$83.5m           | \$76.0m                | 6.50%        | 11,283         | 7,401        | 3.9                       | 85.7%                  |
| 100 Brookes Street, Fortitude Valley           | QLD   | \$79.5m           | \$77.5m                | 6.25%        | 9,519          | 8,352        | 3.7                       | 100.0%                 |
| 483 Kingsford Smith Drive, Hamilton            | QLD   | \$78.5m           | \$78.5m                | 6.25%        | 9,239          | 8,497        | 5.9                       | 94.0%                  |
| 35 Robina Town Centre Drive, Robina            | QLD   | \$54.0m           | \$54.0m                | 7.25%        | 9,814          | 5,502        | 4.3                       | 100.0%                 |
| 555 Coronation Drive, Toowong                  | QLD   | \$29.0m           | \$28.8m                | 7.75%        | 5,567          | 5,209        | 3.2                       | 60.7%                  |
| 60 Marcus Clarke, Canberra                     | ACT   | \$62.0m           | \$62.0m                | 7.00%        | 12,098         | 5,125        | 2.0                       | 100.0%                 |
| 54 Marcus Clarke, Canberra                     | ACT   | \$21.3m           | \$20.9m                | 7.50%        | 5,157          | 4,120        | 3.2                       | 95.8%                  |
| 144 Stirling Street, Perth                     | WA    | \$54.5m           | \$54.5m                | 7.50%        | 11,042         | 4,936        | 2.0                       | 100.0%                 |
| 42-46 Colin Street, West Perth                 | WA    | \$35.3m           | \$35.3m                | 7.25%        | 8,467          | 4,163        | 3.8                       | 100.0%                 |
| 1 Richmond Road, Keswick                       | SA    | \$36.1m           | \$33.0m                | 7.50%        | 8,087          | 4,464        | 4.0                       | 100.0%                 |
| 131-139 Grenfell Street, Adelaide <sup>5</sup> | SA    | \$17.0m           | \$17.0m                | 7.75%        | 4,052          | 4,196        | 0.4                       | 100.0%                 |
| <b>Total / Average</b>                         |       | <b>\$1,400.0m</b> | <b>\$1,391.6m</b>      | <b>6.22%</b> | <b>218,080</b> | <b>6,420</b> | <b>3.9</b>                | <b>98.4%</b>           |

1) Weighted by gross income  
2) By area  
3) 50% interest

4) 25% interest  
5) Levels 5-9

## Portfolio diversification (by value)

Geographic Diversification

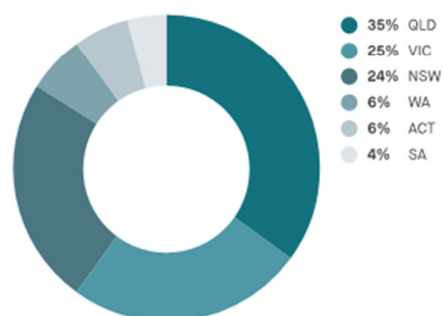

Tenant composition (by income)

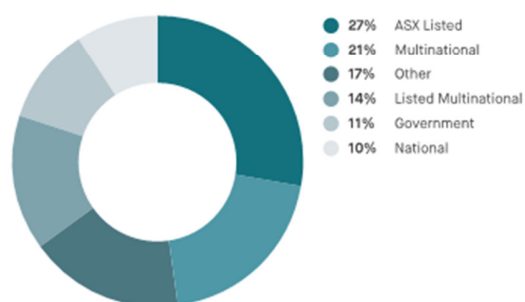

Tenant industry sector diversification

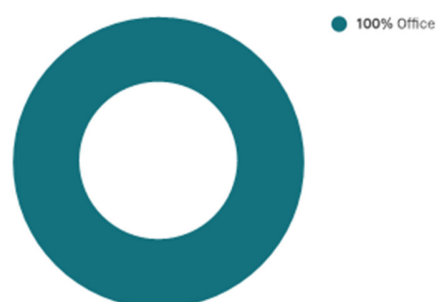

Tenant profile by size (cohort by no. tenants)

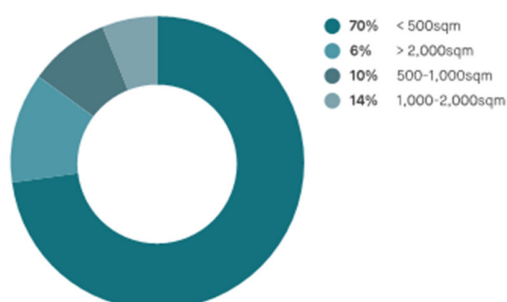

Weighted average lease expiry (by income)

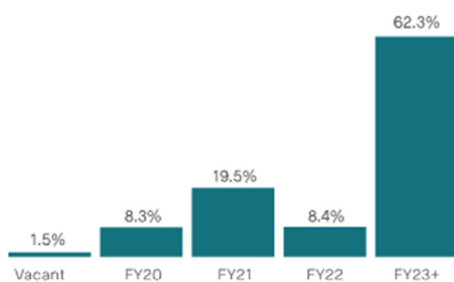

## 2.6 Centuria Office REIT Property Overview 2020

### Overview

#### Key portfolio metrics<sup>1</sup>

| Metric                  | Total   |
|-------------------------|---------|
| Assets (qty)            | 23      |
| Book value (\$m)        | 2,053   |
| Capitalisation rate (%) | 5.93    |
| Net Lettable Area (sqm) | 304,586 |
| Occupancy (by Income)   | 98.1    |
| WALE (by Income)        | 4.7     |

#### Top 10 tenants (by gross income)<sup>1</sup>

| Rank | Tenant                  | % Total Income |
|------|-------------------------|----------------|
| 1    | Government (Aust)       | 13.6%          |
| 2    | Government (WA)         | 4.6%           |
| 3    | Infosys Technologies    | 4.5%           |
| 4    | Laing O'Rourke          | 3.7%           |
| 5    | Foxtel                  | 3.1%           |
| 6    | Insurance Australia Ltd | 3.0%           |
| 7    | Ericsson Australia      | 3.0%           |
| 8    | Government (NSW)        | 2.9%           |
| 9    | Government (QLD)        | 2.7%           |
| 10   | Target Australia        | 2.7%           |

#### Portfolio Overview<sup>1</sup>

| Property                             | State | Share | Book Value (\$m)  | Cap. Rate    | NLA (sqm)      | \$ (sqm) (by income) | WALE <sup>1</sup> | Occupancy <sup>2</sup> (100%) |
|--------------------------------------|-------|-------|-------------------|--------------|----------------|----------------------|-------------------|-------------------------------|
| 9 Help Street, Chatswood             | NSW   | 100%  | \$86.0m           | 5.75%        | 9,395          | 9,154                | 2.3               | 95.2%                         |
| 203 Pacific Highway, St Leonards     | NSW   | 50%   | \$69.5m           | 5.88%        | 11,734         | 11,846               | 4.7               | 100.0%                        |
| 201 Pacific Highway, St Leonards     | NSW   | 50%   | \$106.5m          | 5.63%        | 16,498         | 12,911               | 3.7               | 99.6%                         |
| 77 Market Street, Wollongong         | NSW   | 100%  | \$35.5m           | 7.25%        | 6,756          | 5,255                | 5.0               | 100.0%                        |
| 465 Victoria Avenue, Chatswood       | NSW   | 25%   | \$41.9m           | 5.75%        | 15,664         | 10,693               | 3.7               | 99.8%                         |
| 8 Central Avenue, Eveleigh           | NSW   | 50%   | \$189.0m          | 5.38%        | 37,274         | 10,141               | 8.2               | 100.0%                        |
| 54 Marcus Clarke Street, Canberra    | ACT   | 100%  | \$20.9m           | 7.50%        | 5,227          | 3,999                | 3.3               | 93.8%                         |
| 60 Marcus Clarke Street, Canberra    | ACT   | 100%  | \$62.3m           | 7.00%        | 12,097         | 5,146                | 2.4               | 87.5%                         |
| 2 Phillip Law Street, Canberra       | ACT   | 100%  | \$253.0m          | 5.13%        | 27,411         | 9,230                | 7.5               | 99.5%                         |
| 555 Coronation Drive, Toowong        | QLD   | 100%  | \$34.5m           | 7.00%        | 5,567          | 6,197                | 5.3               | 100.0%                        |
| 35 Robina Town Centre Drive, Robina  | QLD   | 100%  | \$52.0m           | 7.25%        | 9,814          | 5,298                | 0.8               | 100.0%                        |
| 154 Melbourne Street, South Brisbane | QLD   | 100%  | \$88.0m           | 6.00%        | 11,292         | 7,793                | 3.0               | 100.0%                        |
| 483 Kingsford Smith Drive, Hamilton  | QLD   | 100%  | \$77.5m           | 6.25%        | 9,228          | 8,398                | 5.1               | 96.2%                         |
| 825 Ann Street, Fortitude Valley     | QLD   | 100%  | \$163.0m          | 6.00%        | 19,151         | 8,511                | 3.3               | 97.1%                         |
| 100 Brookes Street, Fortitude Valley | QLD   | 100%  | \$78.5m           | 6.25%        | 9,533          | 8,235                | 3.7               | 80.9%                         |
| 576 Swan Street, Richmond            | VIC   | 100%  | \$66.5m           | 5.50%        | 8,331          | 7,982                | 2.0               | 100.0%                        |
| 2 Kendall Street, Williams Landing   | VIC   | 100%  | \$64.5m           | 6.00%        | 12,961         | 4,977                | 8.4               | 100.0%                        |
| 818 Bourke Street, Docklands         | VIC   | 100%  | \$223.0m          | 5.13%        | 23,273         | 9,582                | 2.3               | 99.2%                         |
| 131-139 Grenfell Street, Adelaide    | SA    | 100%  | \$17.3m           | 7.75%        | 4,052          | 4,258                | 1.4               | 100.0%                        |
| 1 Richmond Road, Keswick             | SA    | 100%  | \$36.0m           | 7.25%        | 8,085          | 4,453                | 3.0               | 100.0%                        |
| 42-46 Colin Street, West Perth       | WA    | 100%  | \$35.0m           | 7.25%        | 8,467          | 4,134                | 2.8               | 100.0%                        |
| 144 Stirling Street, East Perth      | WA    | 100%  | \$65.0m           | 6.25%        | 11,042         | 5,887                | 8.5               | 100.0%                        |
| 235 William Street, Northbridge      | WA    | 100%  | \$188.0m          | 6.50%        | 21,736         | 8,649                | 7.0               | 98.9%                         |
| <b>Total / Average</b>               |       |       | <b>\$2,053.3m</b> | <b>5.93%</b> | <b>304,586</b> | <b>7,895</b>         | <b>4.7</b>        | <b>98.1%</b>                  |

1) Weighted by gross income

2) By area

# Portfolio diversification (by value)

Geographic Diversification

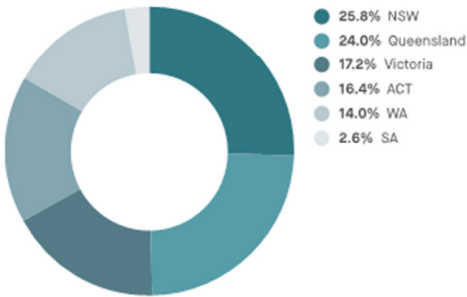

Tenant composition (by income)

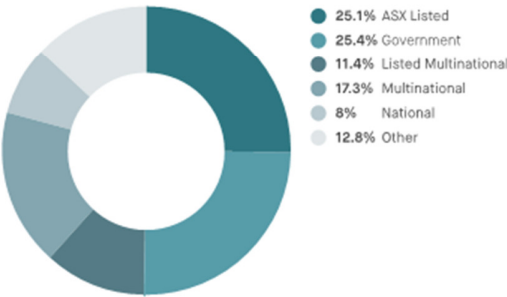

Tenant industry sector diversification

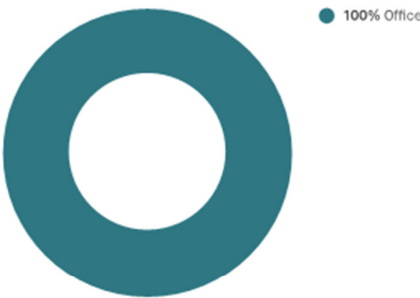

Tenant profile by size (cohort by no. tenants)

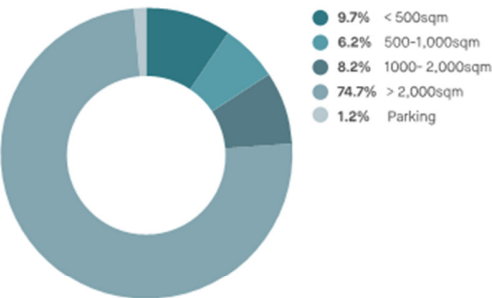

Weighted average lease expiry (by income)

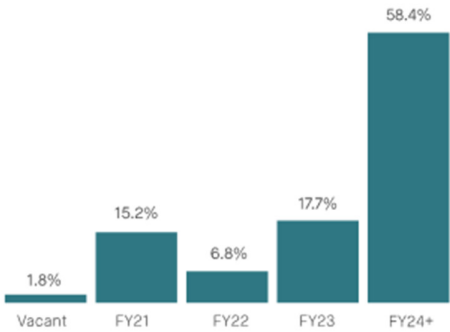

## 2.7 Centuria Office REIT Property Overview 2021

### Overview

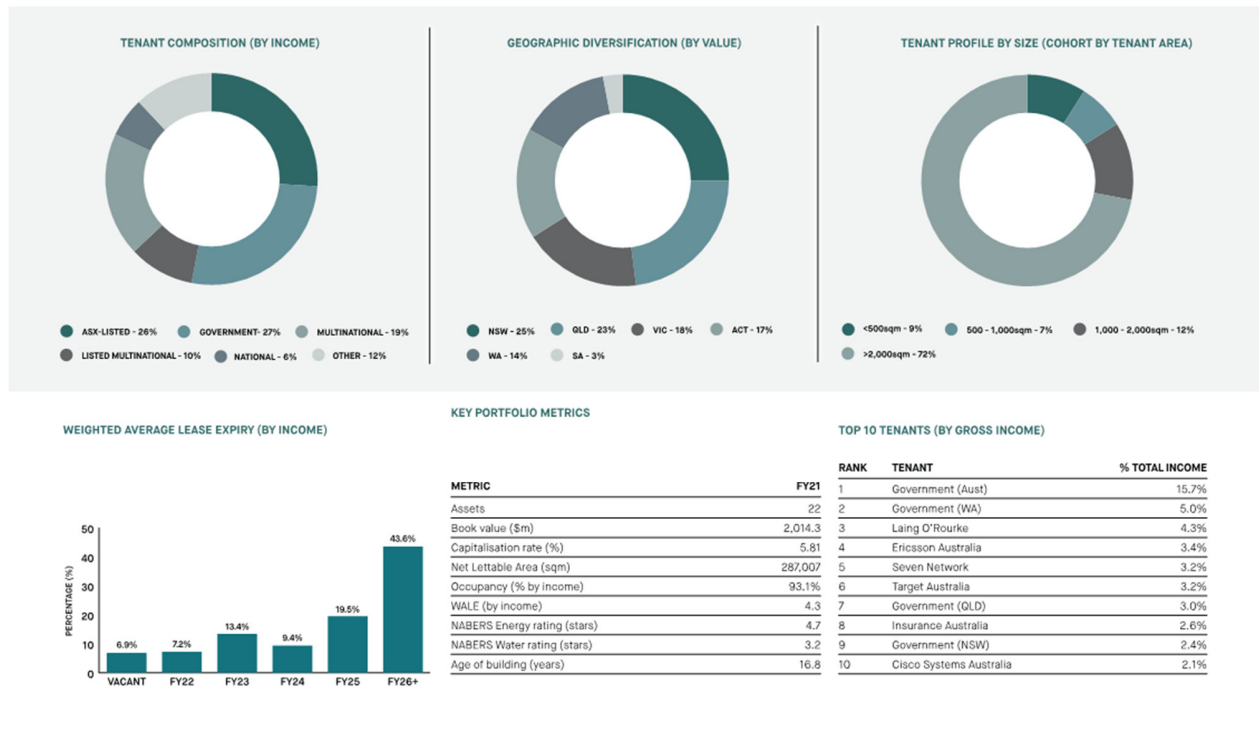

## Overview

| PROPERTY                                          | STATE | SHARE | BOOK VALUE (\$)   | CAP RATE     | NLA (\$GM)     | \$ (\$GM)    | WALE (INCOME) <sup>1</sup> | OCCUPANCY (INCOME) <sup>2</sup> |
|---------------------------------------------------|-------|-------|-------------------|--------------|----------------|--------------|----------------------------|---------------------------------|
| 8 Central Avenue, Eveleigh                        | NSW   | 50%   | \$200.0m          | 5.13%        | 36,619         | 10,923       | 9.4                        | 99.4%                           |
| 201 Pacific Highway, St Leonards                  | NSW   | 50%   | \$107.0m          | 5.63%        | 16,498         | 12,971       | 2.9                        | 98.7%                           |
| 9 Help Street, Chatswood                          | NSW   | 100%  | \$92.5m           | 5.38%        | 9,384          | 9,858        | 2.2                        | 90.9%                           |
| 203 Pacific Highway, St Leonards                  | NSW   | 50%   | \$68.0m           | 5.75%        | 11,735         | 11,590       | 3.8                        | 99.3%                           |
| 77 Market Street, Wollongong                      | NSW   | 100%  | \$36.0m           | 6.75%        | 6,755          | 5,330        | 4.0                        | 100.0%                          |
| 2 Phillip Law Street, Canberra                    | ACT   | 100%  | \$252.0m          | 5.00%        | 27,411         | 9,193        | 6.9                        | 99.9%                           |
| 60 Marcus Clarke Street, Canberra                 | ACT   | 100%  | \$61.0m           | 6.75%        | 12,094         | 5,044        | 2.1                        | 76.9%                           |
| 54 Marcus Clarke Street, Canberra                 | ACT   | 100%  | \$22.8m           | 7.25%        | 5,200          | 4,384        | 4.0                        | 89.8%                           |
| 825 Ann Street, Fortitude Valley                  | QLD   | 100%  | \$155.0m          | 6.00%        | 19,151         | 8,094        | 2.7                        | 100.0%                          |
| 100 Brookes Street, Fortitude Valley              | QLD   | 100%  | \$82.0m           | 6.00%        | 9,533          | 8,602        | 4.9                        | 100.0%                          |
| 154 Melbourne Street, South Brisbane              | QLD   | 100%  | \$80.5m           | 6.00%        | 11,292         | 7,129        | 2.0                        | 99.0%                           |
| 483 Kingsford Smith Drive, Hamilton               | QLD   | 100%  | \$77.0m           | 6.25%        | 9,241          | 8,332        | 4.8                        | 96.3%                           |
| 35 Robina Town Centre Drive, Robina               | QLD   | 100%  | \$42.0m           | 7.50%        | 9,003          | 4,665        | 1.0                        | 88.6%                           |
| 555 Coronation Drive, Toowong                     | QLD   | 100%  | \$39.0m           | 6.75%        | 5,567          | 7,006        | 5.7                        | 100.0%                          |
| 818 Bourke Street, Docklands                      | VIC   | 100%  | \$220.0m          | 5.13%        | 23,096         | 9,525        | 1.8                        | 60.7%                           |
| 2 Kendall Street, Williams Landing                | VIC   | 100%  | \$69.0m           | 5.75%        | 12,961         | 5,324        | 7.4                        | 100.0%                          |
| 576 Swan Street, Richmond                         | VIC   | 100%  | \$65.5m           | 5.50%        | 8,240          | 7,949        | 2.8                        | 66.6%                           |
| 1 Richmond Road, Keswick                          | SA    | 100%  | \$39.2m           | 7.00%        | 8,085          | 4,848        | 4.1                        | 100.0%                          |
| 131-139 Grenfell Street, Adelaide (Held For Sale) | SA    | 100%  | \$19.0m           | 7.00%        | 4,059          | 4,681        | 3.3                        | 100.0%                          |
| 235 William Street, Northbridge                   | WA    | 100%  | \$181.8m          | 6.50%        | 21,575         | 8,424        | 4.3                        | 94.9%                           |
| 144 Stirling Street, East Perth                   | WA    | 100%  | \$70.0m           | 6.00%        | 11,042         | 6,340        | 7.5                        | 100.0%                          |
| 42-46 Colin Street, West Perth                    | WA    | 100%  | \$35.0m           | 7.00%        | 8,467          | 4,134        | 2.0                        | 100.0%                          |
| <b>Total<sup>3</sup></b>                          |       |       | <b>\$2,014.3m</b> | <b>5.81%</b> | <b>287,007</b> | <b>7,912</b> | <b>4.3</b>                 | <b>93.1%</b>                    |

(1) By gross income (equity share)

(2) Investment properties \$2,014.3m, excludes \$32.0m leasehold asset under AASB 16.



## 2.8 Centuria Office REIT Property Overview 2022 (Half Year)

### Overview

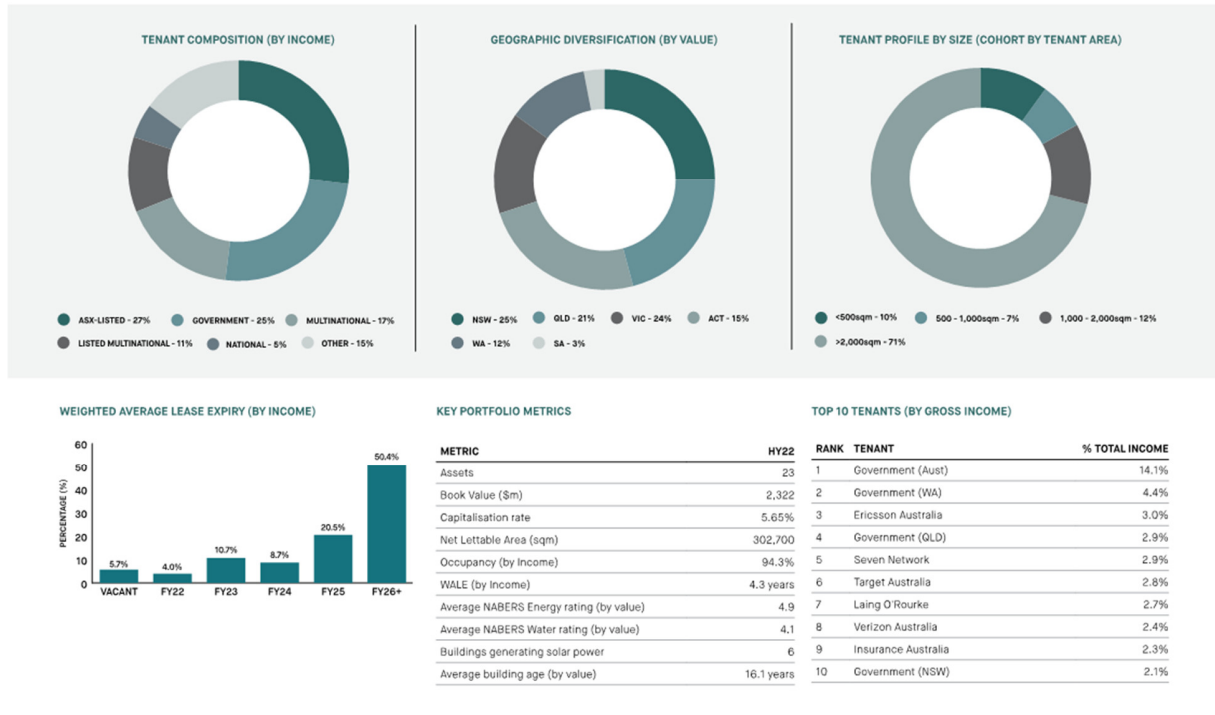

## Overview

| PROPERTY                                       | STATE | SHARE | BOOK VALUE (\$)   | CAP RATE     | NLA (SQM)      | \$ (SQM)     | WALE (YEARS) <sup>1</sup> | OCCUPANCY (INCOME) <sup>2</sup> |
|------------------------------------------------|-------|-------|-------------------|--------------|----------------|--------------|---------------------------|---------------------------------|
| 8 Central Avenue, Eveleigh                     | NSW   | 50%   | 210.0             | 5.00%        | 36,619         | 11,470       | 8.7                       | 95.5%                           |
| 201 Pacific Highway, St Leonards               | NSW   | 50%   | 107.5             | 5.50%        | 16,498         | 13,032       | 2.6                       | 94.5%                           |
| 9 Help Street, Chatswood                       | NSW   | 100%  | 95.0              | 5.38%        | 9,383          | 10,125       | 2.9                       | 100.0%                          |
| 203 Pacific Highway, St Leonards               | NSW   | 50%   | 68.0              | 5.75%        | 11,735         | 11,590       | 3.4                       | 99.3%                           |
| 77 Market Street, Wollongong                   | NSW   | 100%  | 37.0              | 6.50%        | 6,755          | 5,478        | 3.5                       | 100.0%                          |
| 2 Phillip Law Street, Canberra                 | ACT   | 100%  | 252.0             | 5.00%        | 27,411         | 9,193        | 6.9                       | 100.0%                          |
| 60 Marcus Clarke Street, Canberra              | ACT   | 100%  | 62.0              | 6.50%        | 12,094         | 5,126        | 2.5                       | 78.6%                           |
| 54 Marcus Clarke Street, Canberra              | ACT   | 100%  | 24.0              | 7.00%        | 5,200          | 4,615        | 3.6                       | 95.3%                           |
| 825 Ann Street, Fortitude Valley               | QLD   | 100%  | 158.5             | 5.75%        | 19,138         | 8,282        | 3.1                       | 100.0%                          |
| 100 Brookes Street, Fortitude Valley           | QLD   | 100%  | 85.0              | 5.88%        | 9,533          | 8,916        | 4.4                       | 100.0%                          |
| 154 Melbourne Street, South Brisbane           | QLD   | 100%  | 81.0              | 6.00%        | 11,292         | 7,173        | 1.7                       | 100.0%                          |
| 483 Kingsford Smith Drive, Hamilton            | QLD   | 100%  | 79.5              | 6.00%        | 9,161          | 8,678        | 4.5                       | 100.0%                          |
| 555 Coronation Drive, Toowong                  | QLD   | 100%  | 45.5              | 6.00%        | 5,567          | 8,173        | 5.2                       | 100.0%                          |
| 35 Robina Town Centre Drive, Robina            | QLD   | 100%  | 44.5              | 7.00%        | 8,912          | 4,993        | 2.7                       | 100.0%                          |
| 818 Bourke Street, Docklands                   | VIC   | 100%  | 217.0             | 5.13%        | 23,096         | 9,396        | 1.7                       | 63.0%                           |
| 101 Moray St, South Melbourne                  | VIC   | 100%  | 198.4             | 5.00%        | 15,975         | 12,419       | 6.1                       | 100.0%                          |
| 2 Kendall Street, Williams Landing             | VIC   | 100%  | 71.0              | 5.75%        | 12,961         | 5,478        | 6.9                       | 100.0%                          |
| 576 Swan Street, Richmond                      | VIC   | 100%  | 70.0              | 5.25%        | 8,240          | 8,495        | 2.5                       | 66.6%                           |
| 1 Richmond Road, Keswick                       | SA    | 100%  | 40.3              | 7.00%        | 8,085          | 4,984        | 3.6                       | 100.0%                          |
| 131-139 Grenfell Street, Adelaide              | SA    | 100%  | 19.0              | 7.00%        | 4,059          | 4,681        | 2.8                       | 100.0%                          |
| 235 William Street, Northbridge                | WA    | 100%  | 180.0             | 6.50%        | 21,575         | 8,343        | 3.8                       | 95.1%                           |
| 144 Stirling Street, East Perth                | WA    | 100%  | 73.3              | 6.00%        | 11,042         | 6,634        | 7.1                       | 100.0%                          |
| 42-46 Colin Street, West Perth                 | WA    | 100%  | 35.5              | 7.00%        | 8,370          | 4,241        | 1.9                       | 100.0%                          |
| <b>TOTAL PORTFOLIO (DEC-21)<sup>2</sup></b>    |       |       | <b>2,254</b>      | <b>5.65%</b> | <b>302,700</b> | <b>8,339</b> | <b>4.3</b>                | <b>94.2%</b>                    |
| <b>Acquisitions Yet to Settle</b>              |       |       |                   |              |                |              |                           |                                 |
| 203 Pacific Highway, St Leonards               | NSW   | 50%   | 68.0              | 5.75%        | N/A            | 11,590       | 3.4                       | 99.3%                           |
| <b>TOTAL PORTFOLIO (PRO FORMA)<sup>2</sup></b> |       |       | <b>\$2,322.0m</b> | <b>5.65%</b> | <b>302,700</b> | <b>8,409</b> | <b>4.3</b>                | <b>94.3%</b>                    |

1. By gross income (equity share)
2. Investment properties \$2,322.0m, excludes \$31.8m leasehold asset under AASB 16.

## Supplementary-3 Figures

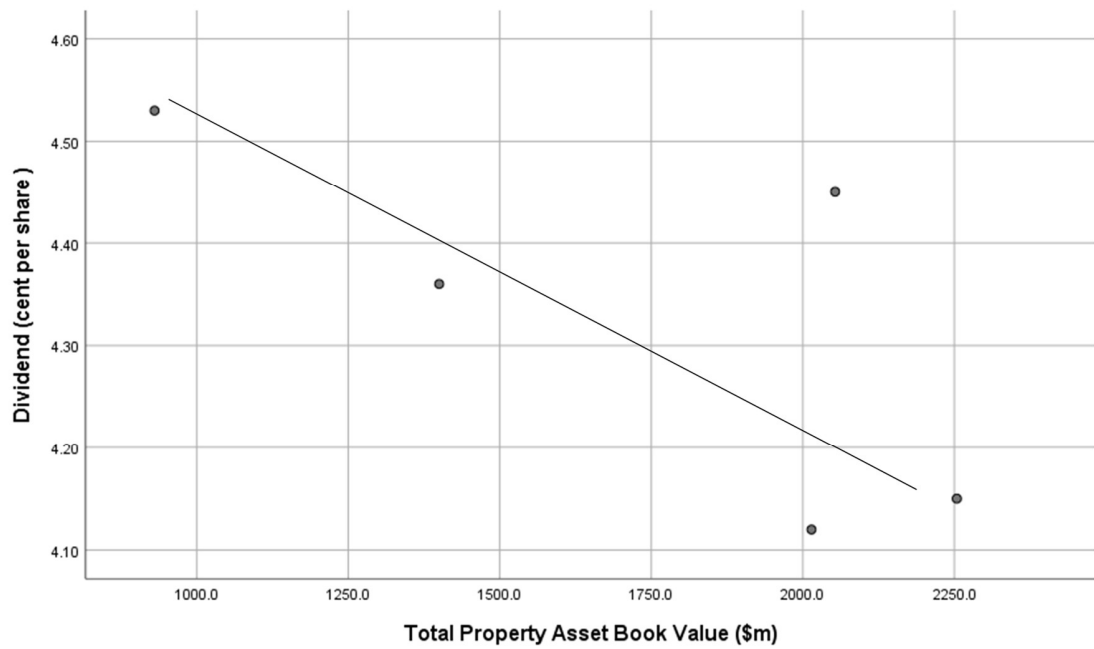

**Figure S1.** Scatter diagram – Total Property Asset Book Value & Dividend.

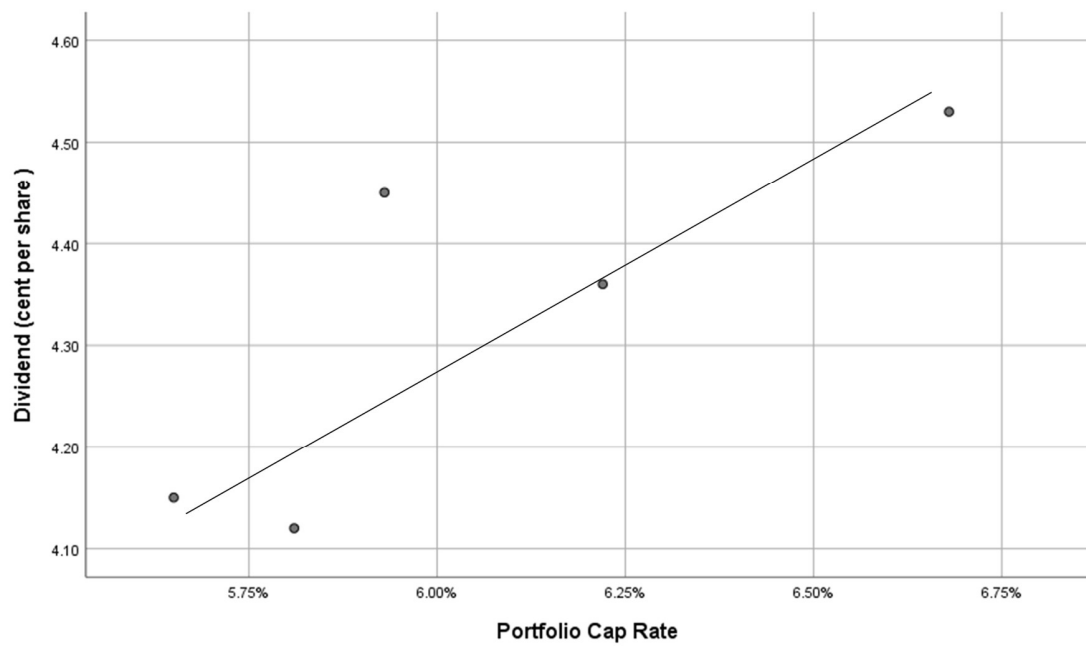

**Figure S2.** Scatter diagram – Portfolio Cap Rate & Divide.

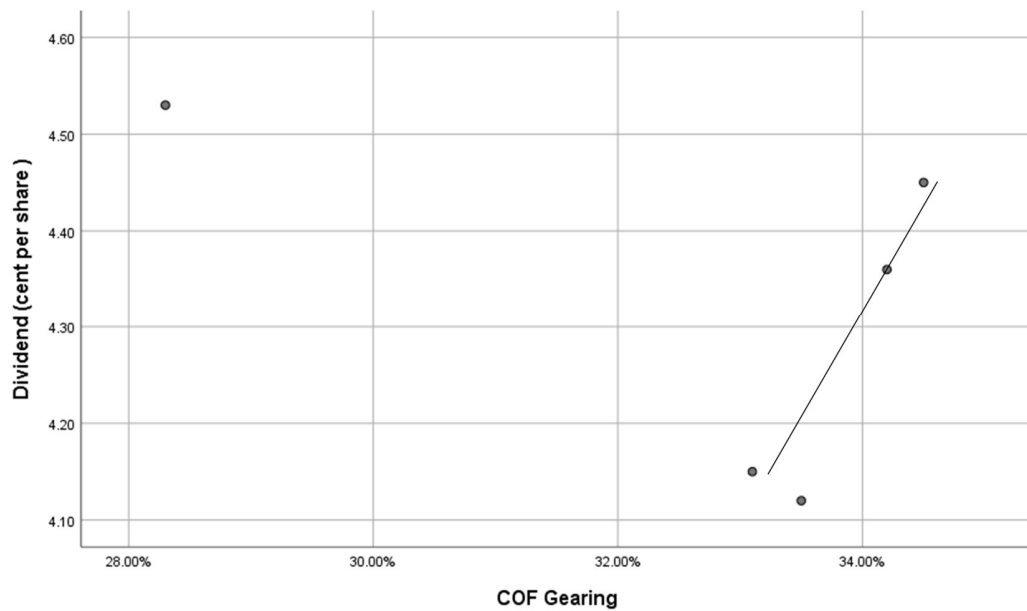

**Figure S3.** Scatter diagram - Gearing & Dividend.

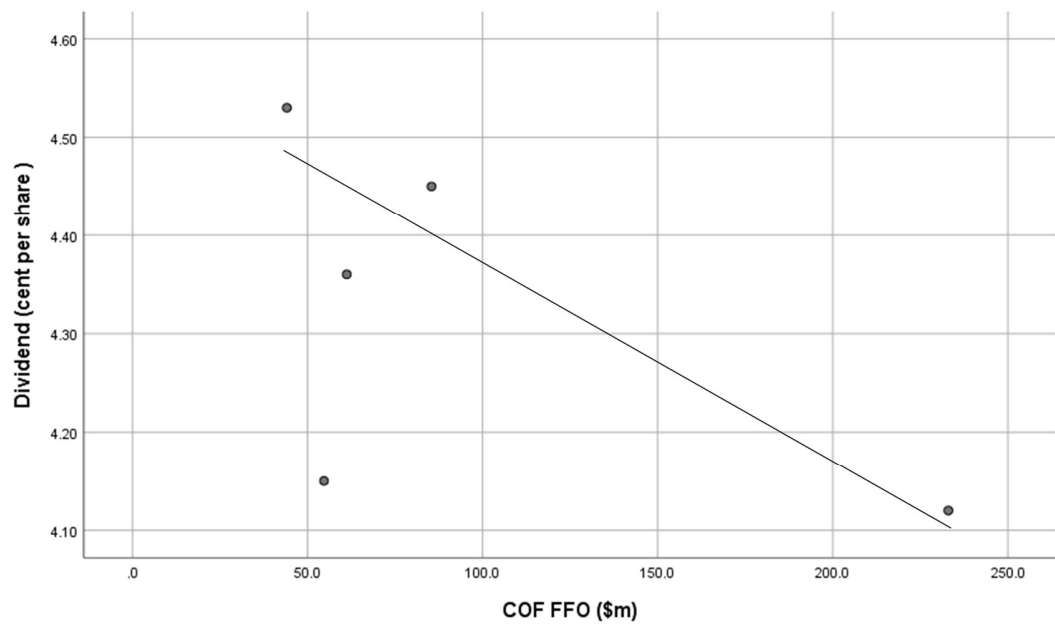

**Figure S4.** Scatter diagram – FFO & Dividend.

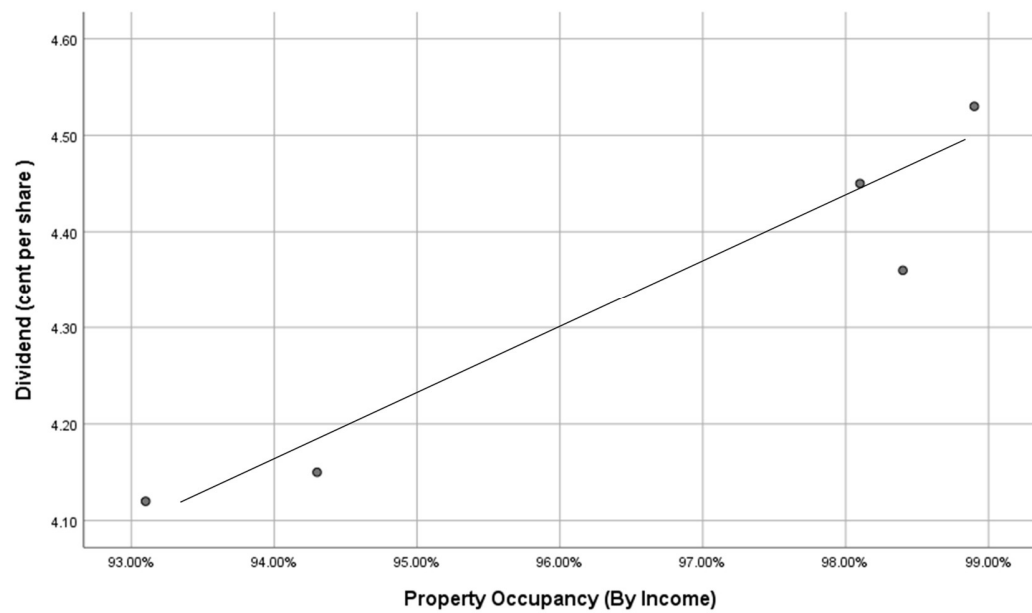

**Figure S5.** Scatter diagram – Property Occupancy & Dividend.

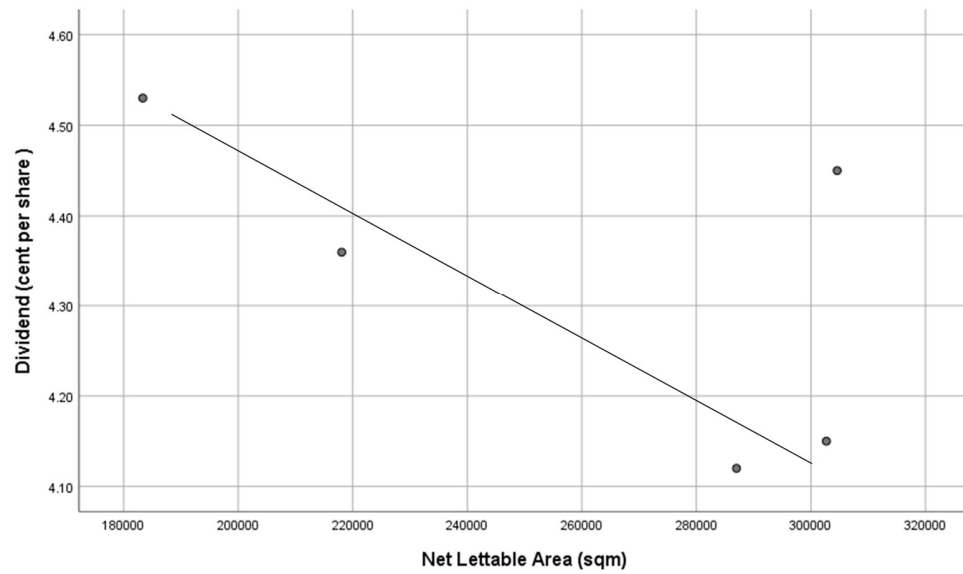

**Figure S6.** Scatter diagram – Net Lettable Area & Dividend.

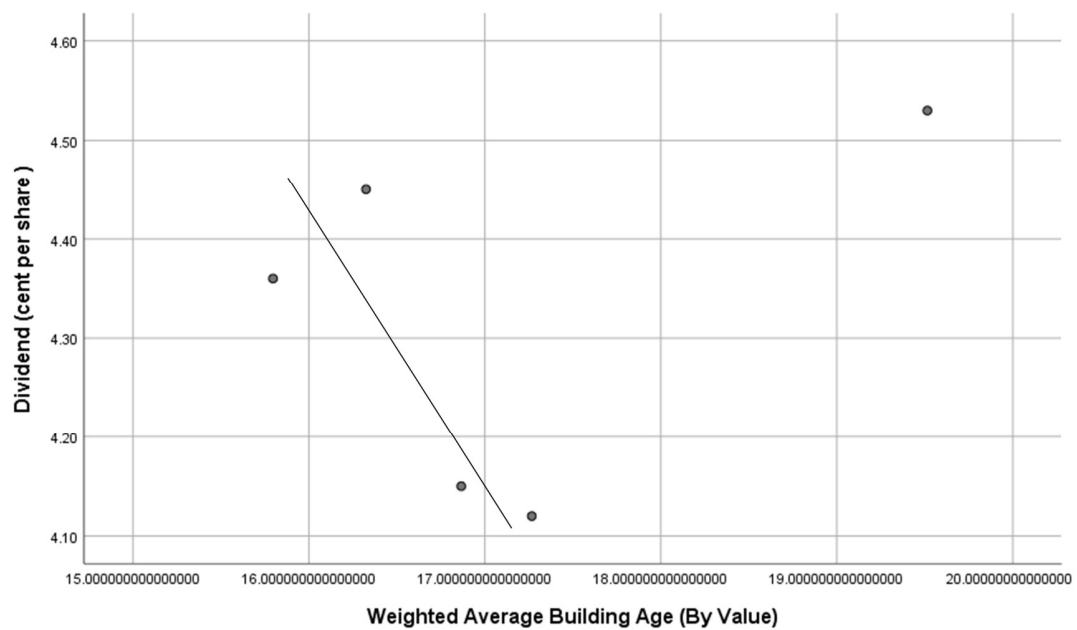

**Figure S7.** Scatter diagram – Weighted Average Building & Dividend.

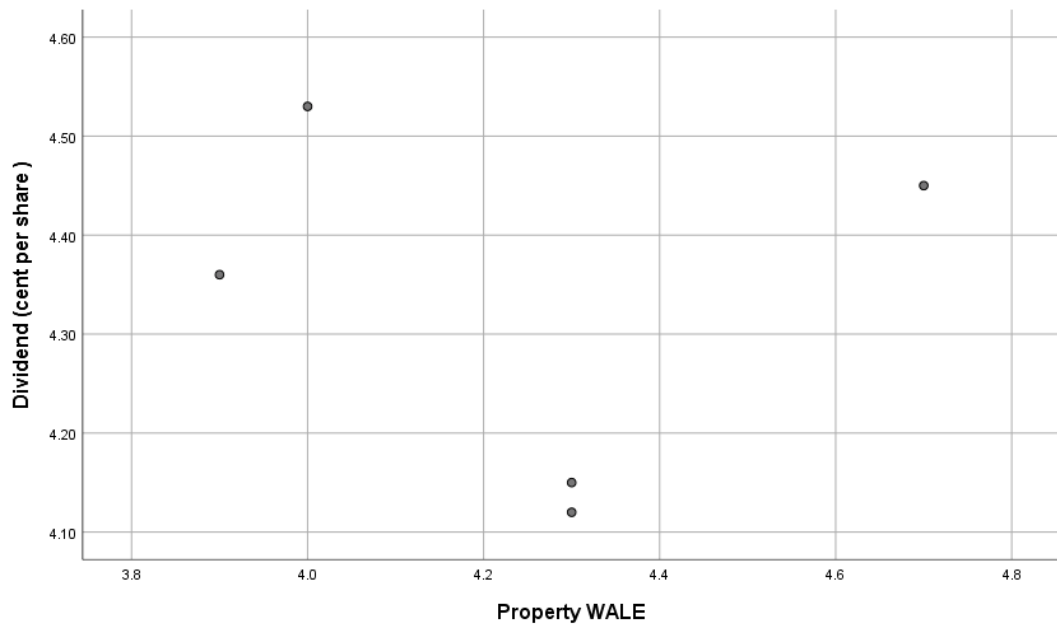

**Figure S8.** Scatter diagram – Property WALE & Dividend.

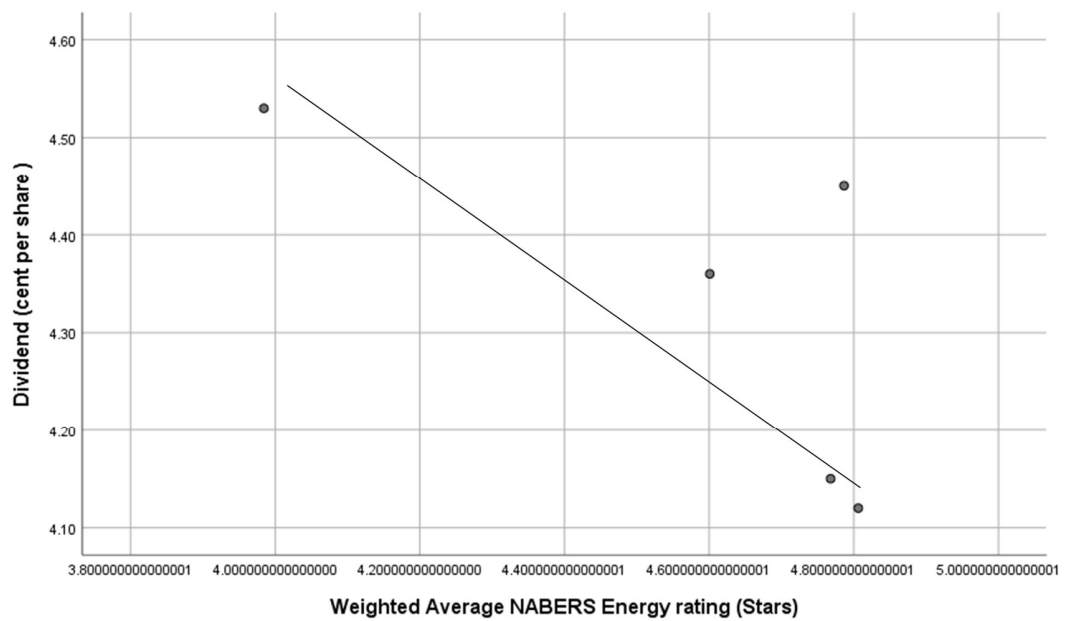

**Figure S9.** Scatter diagram – Weighted Average NABERS Energy Rating & Dividend.

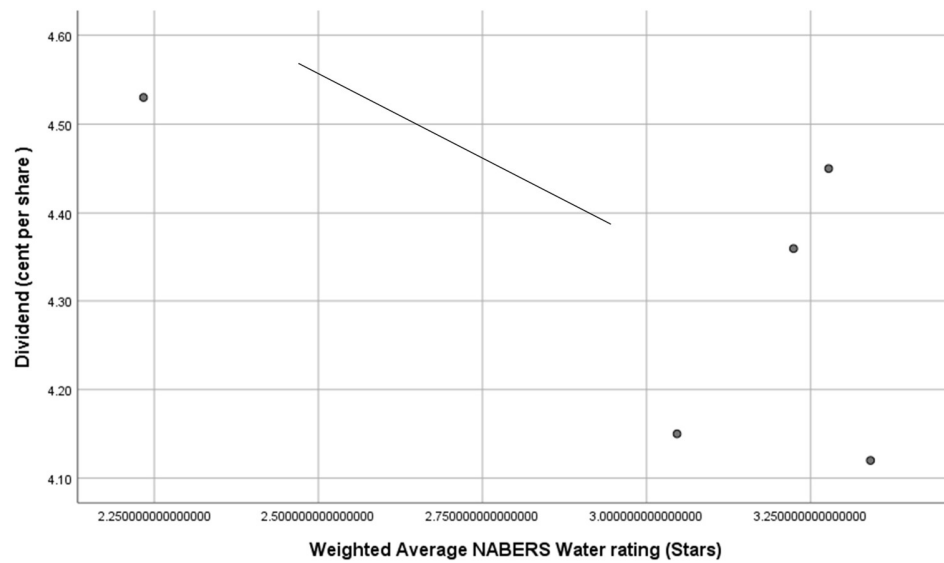

**Figure S10.** Scatter diagram – Weighted Average NABERS Water Rating & Dividend.

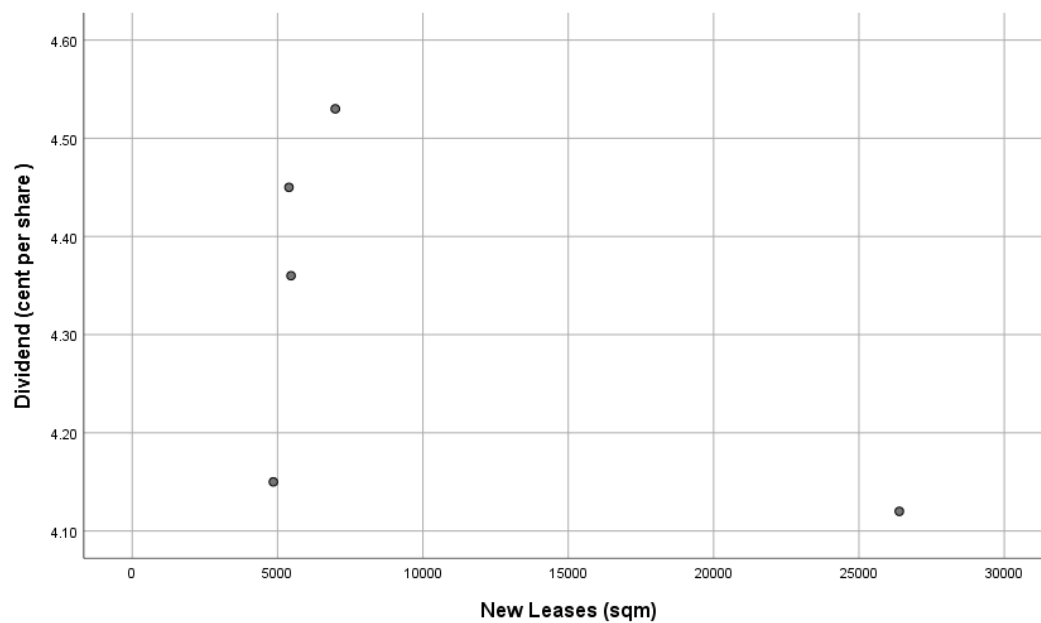

**Figure S11.** Scatter diagram – New Leases & Dividend.



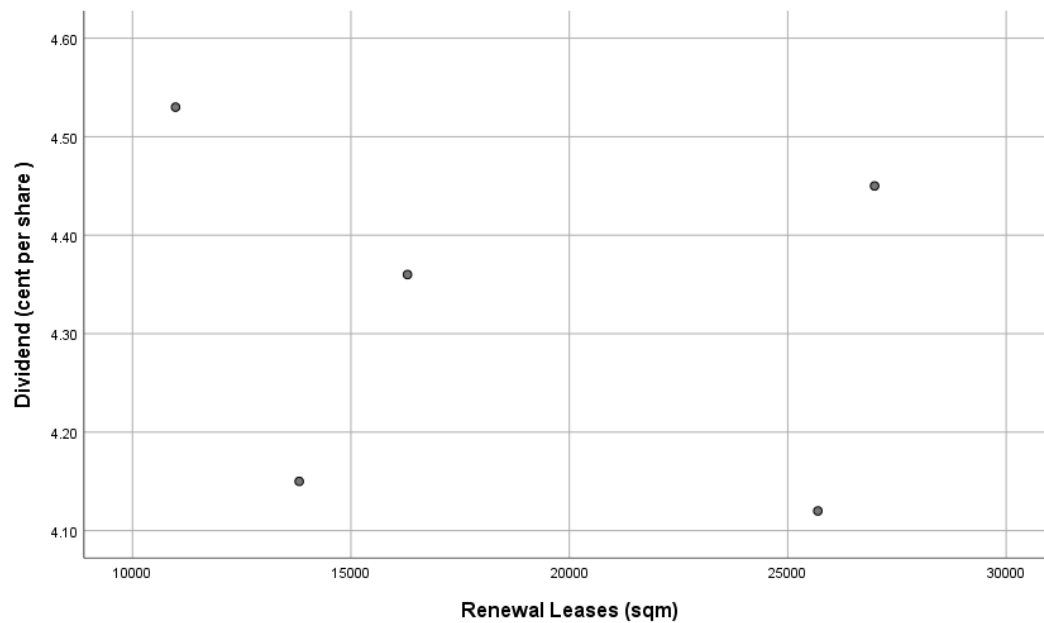

**Figure S12.** Scatter diagram – Renewal Leases & Dividend..

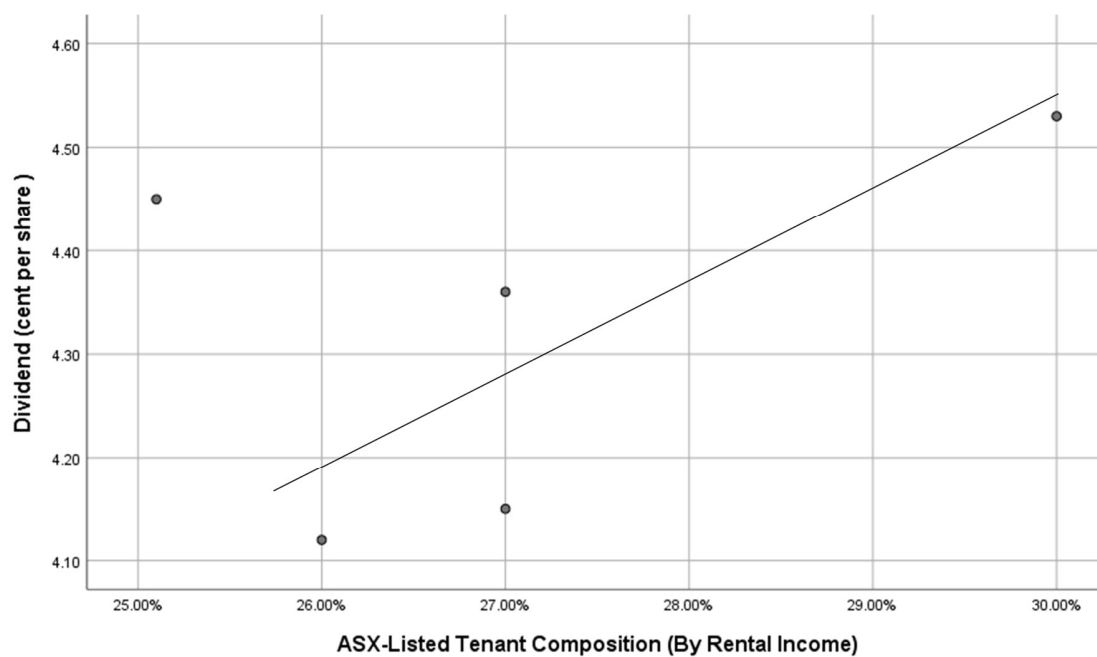

**Figure S13.** Scatter diagram – ASX-Listed Tenant Composition & Dividend.

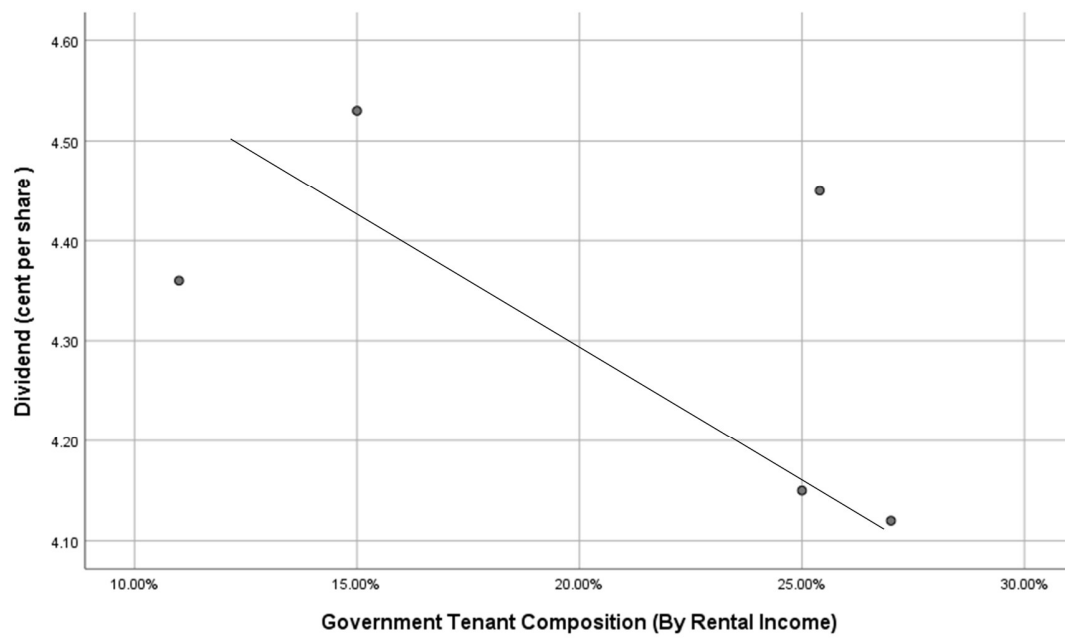

**Figure S14.** Scatter diagram – Government Tenant Composition & Dividend.
